# 1 **Genome-wide fitness assessment during diurnal growth reveals an** 2 **expanded role of the cyanobacterial circadian clock protein KaiA**

3 David G. Welkie<sup>1</sup>, Benjamin E. Rubin<sup>2</sup>, Yong-Gang Chang<sup>3</sup>, Spencer Diamond<sup>2,4</sup>, Scott A.  
4 Rifkin<sup>2</sup>, Andy LiWang<sup>3</sup>, Susan S. Golden<sup>1,2</sup>

5 <sup>1</sup>Center for Circadian Biology, University of California, San Diego, La Jolla, CA; <sup>2</sup>Division of  
6 Biological Sciences, University of California San Diego, La Jolla CA; <sup>3</sup>School of Natural  
7 Sciences, University of California, Merced, CA; <sup>4</sup>Department of Earth and Planetary Science,  
8 University of California, Berkeley, CA.

9

## 10 **Abstract**

11 The recurrent pattern of light and darkness generated by Earth's axial rotation has profoundly  
12 influenced the evolution of organisms, selecting for both biological mechanisms that respond  
13 acutely to environmental changes and circadian clocks that program physiology in anticipation  
14 of daily variations. The necessity to integrate environmental responsiveness and circadian  
15 programming is exemplified in photosynthetic organisms such as cyanobacteria, which depend  
16 on light-driven photochemical processes. The cyanobacterium *Synechococcus elongatus* PCC  
17 7942 is an excellent model system for dissecting these entwined mechanisms. Its core circadian  
18 oscillator, consisting of three proteins KaiA, KaiB, and KaiC, transmits time-of-day signals to  
19 clock-output proteins, which reciprocally regulate global transcription. Research performed  
20 under constant light facilitates analysis of intrinsic cycles separately from direct environmental  
21 responses, but does not provide insight into how these regulatory systems are integrated during  
22 light-dark cycles. Thus, we sought to identify genes that are specifically necessary in a day-night  
23 environment. We screened a dense bar-coded transposon library in both continuous light and  
24 daily cycling conditions and compared the fitness consequences of loss of each nonessential  
25 gene in the genome. Although the clock itself is not essential for viability in light-dark cycles, the  
26 most detrimental mutations revealed by the screen were those that disrupt KaiA. The screen  
27 broadened our understanding of light-dark survival in photosynthetic organisms, identified  
28 unforeseen clock-protein interaction dynamics, and reinforced the role of the clock as a negative  
29 regulator of a night-time metabolic program that is essential for *S. elongatus* to survive in the  
30 dark.

## 31 **Significance**

32 Understanding how photosynthetic bacteria respond to and anticipate natural light–dark cycles  
33 is necessary for predictive modeling, bioengineering, and elucidating metabolic strategies for  
34 diurnal growth. Here, we identify the genetic components that are important specifically under  
35 light-dark cycling conditions and determine how a properly functioning circadian clock prepares  
36 metabolism for darkness, a starvation period for photoautotrophs. This study establishes that  
37 the core circadian clock protein KaiA is necessary to enable rhythmic de-repression of a night-  
38 time circadian program.

## 39 **Specific Contributions**

40 DGW BR SD and SSG conceived and designed the project. DGW BR and YGC performed the  
41 experiments and analyzed the data. SAR wrote the R scripts for RB-TnSeq conditional fitness  
42 analysis. YGC and AL interpreted fluorescence anisotropy data. DGW BR SSG YGC and AL  
43 wrote the manuscript.

44 \body

## 45 Introduction

46 Photosynthetic organisms experience a dramatic change in physiology and metabolism each  
47 day when the sun sets and the daytime processes related to photosynthesis become  
48 inoperative. Like many diverse organisms throughout nature, prokaryotic cyanobacteria have  
49 evolved circadian clocks that aid in the temporal orchestration of activities that are day- or night-  
50 appropriate. The circadian clock's contribution towards fitness in changing environments was  
51 first demonstrated in 1998, when it was shown that strains of the cyanobacterium  
52 *Synechococcus elongatus* PCC 7942 with intrinsic circadian periods that match that of external  
53 light-dark cycles (LDC) outcompete strains that have different periods (1, 2). More recent  
54 experiments showed the value of preparing for night: when cells synchronized to different  
55 phases of the circadian cycle are mixed and then exposed to a pulse of darkness, those whose  
56 internal clock corresponds to a dawn or day-time phase have a higher occurrence of arrested  
57 growth upon re-illumination than those synchronized to anticipate darkness at the time of the  
58 pulse (3). These data support the hypothesis that the clock acts to prepare the cell for  
59 conditions that are predictable and recurrent, such as night following day.

60 A fitness advantage of appropriate circadian timing signals is not exclusive to cyanobacteria, as  
61 is observed in the model plant *Arabidopsis* (4, 5) and in humans, where circadian disruption can  
62 result in myriad adverse health effects including cardiovascular disease, cancer, and sleep  
63 disorders (6–8). Although the fundamental properties of circadian rhythms are shared across  
64 the domains of life, the molecular networks that generate them vary (9). In *S. elongatus* a three-  
65 protein oscillator comprising the proteins KaiA, KaiB, and KaiC sets up a circadian cycle of KaiC  
66 phosphorylation. This oscillator even functions *in vitro* when mixed at appropriate ratios with  
67 ATP (10), which has provided a powerful tool for exploring the mechanism that generates  
68 circadian rhythms. Genetic, biochemical, metabolic, and structural inquiries have revealed that  
69 the *S. elongatus* oscillator actively turns off a night-time metabolic program prior to dawn by  
70 triggering the dephosphorylation of the master transcription factor Regulator of Phycobilisome  
71 Association A (RpaA). It accomplishes this task by recruiting Circadian Input Kinase A (CikA) to  
72 a ring of KaiB that forms on KaiC during the night-time portion of the cycle, thus activating CikA  
73 phosphatase activity against RpaA (11–13). Among the targets of the RpaA regulon are the  
74 genes that facilitate catabolism of glycogen and generation of NADPH via the oxidative pentose  
75 phosphate pathway (14). These enzymatic reactions are essential for the cyanobacterium to  
76 survive the night when photosynthetic generation of reductant is disabled (15, 16).

77 While the molecular mechanisms of the circadian clock are well established in constant light for  
78 *S. elongatus* (17), its role in response to LDC, and the mechanisms by which the cell integrates  
79 circadian and environmental data, are still not understood. There have been few publications on  
80 the topic, and this study is the first to report on a genome-wide screen for LDC-sensitive  
81 mutants. Studies that report conditional LDC effects have been limited to a small number of  
82 genes. For instance, mutants defective for the circadian clock output pathway genes, *rpaA* and  
83 *sasA* (15, 16, 18, 19), and mutants unable to mobilize carbon through the oxidative pentose  
84 phosphate pathway (OPPP) and glycogen breakdown (16, 20, 21), or unable to synthesize the  
85 alarmone nucleotide ppGpp (22, 23), have conditional defects specific to growth in LDC. To  
86 identify the genetic contributors to fitness under LDC and acquire a more comprehensive picture  
87 of the regulatory network, we used an unbiased population-based screen that tracks the fitness  
88 contributions of individual *S. elongatus* genes to reproduction in diel cycles. The method,  
89 random bar code transposon-site sequencing (RB-TnSeq), quantitatively compares the changes  
90 in abundances of individuals in a pooled mutant population over time. This assay allowed the  
91 calculation of a fitness contribution to LDC survival for each nonessential gene in the genome  
92 by leveraging multiple inactivating mutations spread across a genomic locus. This library was  
93 previously used to identify the essential gene set of *S. elongatus* under standard laboratory

94 continuous light conditions (CLC) (24) and to generate an improved the metabolic model for  
95 generating phenotype predictions (25).

96 The results described here provide a comprehensive picture of genes that contribute to fitness  
97 under diurnal growth conditions. In addition to identifying the genetic components previously  
98 known to be critical for growth in LDC we found ~100 new genes whose mutation confers weak  
99 to strong fitness disadvantages. Of these genes, we focused on the top-scoring elements for  
100 LDC-specific defects which, unexpectedly, lie within the *kaiA* gene of the core circadian  
101 oscillator. As no previously known roles for KaiA predicted this outcome, we characterized the  
102 mechanism that underlies the LDC sensitivity of a *kaiA*-null mutant, and revealed interactions  
103 within the oscillator complex that regulate the activation of CikA, an RpaA phosphatase.

## 104 **Results**

### 105 ***Growth of library mutants to assess genetic fitness contributions under light-dark cycles.***

106 The RB-TnSeq mutant library includes a unique identifier sequence, or bar code, at each  
107 insertion site to track each transposon-insertion mutant. Next-generation sequencing is used to  
108 quantify these bar codes within the total DNA of the population, such that the survival and  
109 relative fitness of the approximately 150,000 mutants in the library can be tracked under control  
110 and experimental conditions (26). In this way, the *S. elongatus* RB-TnSeq library can be used  
111 for pooled, quantitative, whole-genome mutant screens.

112 First, the library was thawed, placed into 250-mL flasks, and sampled during incubation in CLC  
113 under only the selective pressure for the transposon antibiotic-resistance marker. Genomic DNA  
114 was extracted, and the bar codes of the mutant population were sequenced to establish a  
115 baseline abundance (**Fig. 1**). The culture was then divided into photobioreactors set to maintain  
116 constant optical density under either CLC, or LDC conditions that mimic day and night. After a  
117 treatment period allowing for approximately 6 generations, the library was again sampled and  
118 bar codes were quantified in a similar fashion. By comparing the frequencies of the bar codes  
119 after growth in LDC to those in CLC (**Dataset S1**), we estimated a quantitative measure of the  
120 fitness contribution for each gene specifically under LDC (**Dataset S2**).

121 After filtering the data as described in the Materials and Methods section we were able to  
122 analyze insertions in 1,872 of the 2,005 non-essential genes (24) in the genome. Each fitness  
123 score that passed our statistical threshold for confidence (FDR <1%) was classified as having a  
124 “strong” (>1.0 or <-1.0), “moderate” (between 1.0 and 0.5 or -1.0 and -0.5), or “negligible /  
125 minor” (between 0 and ±0.5) effect on fitness in LDC. This analysis revealed 90 loci whose  
126 disruption caused strong changes to LDC fitness (41 negatively and 49 positively) and an  
127 additional 130 loci that had moderate effects (**Fig. 2A**). A volcano plot showing the data with  
128 selected genes highlighted in this study is displayed in **Fig. 2B**. Because our initial goal was to  
129 understand the suite of genes required to survive the night, we focused first on those mutants  
130 whose loss specifically debilitates growth in LDC.

### 131 ***Metabolic pathways important for LDC growth***

132 The functional composition of genes found to be either detrimental or favorable to fitness is  
133 indicative of the metabolic processes that are important for growth in LDC (**Fig. 2C**). Genes  
134 identified as necessary in LDC encode enzymes that participate in carbohydrate and central  
135 carbon metabolism, protein turnover and chaperones, CO<sub>2</sub> fixation, and membrane biogenesis.  
136 Strikingly, all genes of the OPPP, *zwf*, *opcA*, *pgl*, and *gnd*, have strong fitness effects (**Fig. 3A**).  
137 In addition, *tal*, the only non-essential gene of the reductive phase, is also essential for LDC  
138 growth. It is known that *tal* mRNA peaks at dusk and that its product acts in a reaction that is  
139 shared between the oxidative and reductive phases of the PPP, linking it to glycolysis; the *tal*  
140 mutant’s sensitivity to LDC supports the hypothesis that Tal is a less recognized, but important,

141 component of the OPPP reactions. Furthermore, all OPPP genes have peak expression at dusk  
142 (27).

143 Disruptions in genes that encode enzymes responsible for glycogen metabolism previously  
144 have been shown to cause LDC sensitivity (21). Our screen clearly identified the genes for  
145 catabolic glycogen metabolism *glgX* and *glgP* as important LDC fitness factors (**Fig. 2B**).  
146 However, the importance of glycogen metabolism in LDC fitness is complicated by evidence  
147 that the anabolic reactions of *glgA* and *glgC* contribute to fitness in CLC as well, due to the  
148 utilization of glycogen as a sink for excess photosynthetically derived electrons (28, 29). Thus,  
149 for genes critical for glycogen anabolism, the differential LDC fitness score is not as striking as  
150 might be expected from phenotypic assays of those mutants. The *glgA* mutants were classified  
151 as having a minor LDC defect, and insufficient reads for *glgC* removed this locus from our  
152 analysis pipeline, leading to a classification of “not determined”. Despite this complication,  
153 mutations in the gene *glgB*, whose product catalyzes the last non-essential step in glycogen  
154 synthesis, caused a strong decrease in LDC fitness, supporting the conclusion that both  
155 glycogen synthesis and breakdown are critical aspects of metabolism in LDC conditions.  
156 Together, the reactions facilitated by these enzymes provide a major source of reductant  
157 (NADPH) in the dark and facilitate the flow of glucose compounds via the breakdown of stored  
158 glycogen into downstream metabolites.

159 Genes involved in DNA repair (such as the transcription-repair coupling factor *mdf*) and  
160 chaperone systems (*clpB1*) are also important for light-dark growth. ClpB1 is known to  
161 contribute to thermotolerance stress and is induced upon dark-light transitions in cyanobacteria  
162 (30, 31). The importance of these genes for surviving light-dark cycles suggests a role in  
163 managing light-induced stress that the transition from dark to light may impose. Moreover,  
164 mutation of any of the three genes that encode enzymes of the glycine cleavage system confer  
165 increased LDC fitness. The glycine decarboxylase complex (GDC) is linked to photorespiratory  
166 mechanisms that respond to high-light stress (32, 33). This result further supports our finding  
167 that variations in the fitness of metabolism genes between CLC and LDC are linked to pathways  
168 that mitigate light stress.

169 In addition to underscoring the importance of the OPPP, glycogen metabolism, and repair  
170 mechanisms in LDC, we also found a strong link between these metabolic pathways and  
171 circadian clock management. Many of the genes essential for growth in LDC are regulated by  
172 the clock output protein RpaA. For instance, the circadian clock gene *kaiC* is itself regulated by  
173 RpaA and its expression is reduced by over 50% in an *rpaA*-null background (12, 14). This  
174 attribute is also shared by the core glycogen metabolism and PPP genes *glgP*, *zwf*, *opcA*, *gnd*,  
175 and *tal*, and genes involved with metal ion homeostasis (*smtA*) and cobalamin biosynthesis  
176 (*cobL*), all of which show significantly reduced transcripts ( $<-1.0 \log_2(\Delta rpaA/WT)$ , wild type) in  
177 the absence of the RpaA (14). These core glycogen metabolism and PPP genes, with the  
178 exception of *tal* and *gnd*, are also direct targets of the transcription factor. This finding is a  
179 common trend in mutants that show strong fitness decreases in LDC, as ~20% (9/41) have  
180 dramatic reductions in mRNA levels in an *rpaA*-null strain. This trend is not the case for any of  
181 the genes identified as mutants that confer increased fitness (**Fig 3B**). These findings support a  
182 growing body of evidence that the ability of *S. elongatus* to initiate a night-time transcriptional  
183 program, and particularly to activate the OPPP pathway genes, is critical for survival through  
184 darkness (15, 16).

### 185 ***Fitness contributions of circadian clock constituents***

186 The mechanism of circadian timekeeping and regulation in cyanobacteria is well understood at  
187 the molecular level (17, 34). The three core clock proteins, KaiA, KaiB, and KaiC orchestrate  
188 circadian oscillation in *S. elongatus* (35), whereby KaiC undergoes a daily rhythm of

189 phosphorylation and dephosphorylation that provides a time indicator to the cell (36, 37). During  
190 the day period, KaiA stimulates KaiC autophosphorylation, and, during the night, KaiB opposes  
191 KaiA's stimulatory activity by sequestering an inactive form of KaiA (38), leading to KaiC  
192 autodephosphorylation. Two histidine kinase proteins, SasA and CikA, engage with the  
193 oscillator at different phases of the cycle, and this interaction stimulates SasA kinase activity to  
194 phosphorylate RpaA and later stimulates CikA phosphatase activity to dephosphorylate RpaA.  
195 Thus, phosphorylated RpaA accumulates during the day, peaking at the day-night transition,  
196 and activates the night-time circadian program.

197 Mutations that caused the most serious defect specifically in LDC were mapped to the gene that  
198 encodes the clock oscillator component KaiA (**Fig. 2B**). This outcome was unexpected because  
199 the known roles of KaiA are to stimulate phosphorylation of KaiC and to enable normal levels of  
200 KaiC and KaiB expression (38, 39). Thus, a KaiA-less strain, in which KaiC levels are low and  
201 hypophosphorylated (39), was expected to behave like a *kaiC* null. A *kaiC* null mutant has no  
202 notable defect in LDC when grown in pure culture (1), and even a *kaiABC* triple deletion,  
203 missing KaiA as well as KaiB and KaiC, grows well in LDC (18).

204 Nonetheless, a *kaiC* null mutant is known to be outcompeted by WT under LDC conditions in  
205 mixed culture (1, 2), which is the situation in this population-based screen. Mutations in *kaiC*  
206 returned negative fitness scores in the current screen, as did bar codes associated with *rpaA*  
207 and *sasA*, two clock-related genes that are known to be important for growth in LDC (18, 20).  
208 RpaA is important for redox balancing, metabolic stability, and carbon partitioning during the  
209 night, and an *rpaA* mutant is severely impaired in LDC (15, 16, 20). While it is identified in the  
210 current screen as LDC sensitive, inactivation of *rpaA* also confers a moderate fitness decrease  
211 under CLC (~-1.0), thus diminishing the differential LDC-specific fitness calculation.

212 Disruptions to other genes related to circadian clock output scored as beneficial to growth in  
213 LDC, increasing the fitness of the strains against the members of the population that carry an  
214 unmutated copy. For instance, mutations within the gene that encodes CikA showed improved  
215 fitness, along with disruptions to the sigma factor encoded by *rpoD2* (40). CikA has several  
216 roles that affect the clock, including synchronization with the environment and maintenance of  
217 WT period; additionally, CikA is stimulated to dephosphorylate RpaA by association with the  
218 oscillator at night (13, 41). Thus, a phenotype for *cikA* mutants that is opposite to that of *sasA*  
219 mutants forms a consistent pattern.

220 From the published biochemical data we would predict that, in a *kaiA* null, SasA kinase would  
221 still be activated by the low levels of unphosphorylated KaiC but that CikA phosphatase would  
222 not be: CikA binds not to KaiC, but to a ring of KaiB that engages hyperphosphorylated KaiC, a  
223 state that is not achieved in the absence of KaiA. Therefore, we would expect that RpaA would  
224 be constitutively phosphorylated in a *kaiA* null mutant and that the cell would be fixed in the  
225 night-time program, where it would be insensitive to LDC. We further investigated the *kaiA*-  
226 mutant phenotype under LDC to test the validity of the RB-TnSeq results.

227 **Growth attenuation and rescue of a *kaiA* mutant.** The strong negative scores of bar codes  
228 for *kaiA* insertion mutants pointed to a severe growth defect in LDC. In order to vet this finding  
229 we tested the phenotype of an insertional knockout of the *kaiA* gene (*kaiA<sup>ins</sup>*), similar to the  
230 strains in the RB-TnSeq library. Assays in CLC vs LDC verified the LDC-specific defect in the  
231 mutant (**Fig. 4A**). Because *kaiABC* deletion mutants and *kaiC* deletion mutants both do not  
232 have an LDC defect in pure culture, the LDC defect seemed to be specific for situations in which  
233 KaiC and KaiB are present without KaiA. The *kaiA* coding region has a known negative element  
234 located within its C-terminal coding region that negatively regulates expression of the  
235 downstream *kaiBC* operon (42, 43) (*kaiA<sup>ins</sup>*), keeping KaiBC levels low. We reasoned that the  
236 loss of KaiA would be exacerbated if expression of KaiBC increased. To test this hypothesis, we

237 measured the growth characteristics of a *kaiA* mutant in which the coding region of *kaiA*,  
238 including the negative element, has been removed and replaced with a drug marker (*kaiA<sup>del</sup>*)  
239 (39). This strain, which is known to have normal or slightly elevated levels of KaiB and KaiC,  
240 exhibited even more dramatic sensitivity to LDC and supported the hypothesis that an  
241 unbalanced clock output signal underlies the LDC sensitivity in the *kaiA* mutant.

242 Knowing that *rpaA*-null mutants, which cannot activate the OPPP genes, have similarly severe  
243 LDC phenotypes, we hypothesized that the *kaiA*-less strains have insufficient phosphorylation of  
244 RpaA to turn on those genes. We reasoned that additionally interrupting the *cikA* gene, whose  
245 product dephosphorylates RpaA in a clock-dependent manner, would help to conserve RpaA  
246 phosphorylation in the *kaiA<sup>del</sup>* strain and increase LDC fitness. Indeed, mutations that disrupt  
247 *cikA* were identified from the population screen as enhancing fitness (**Fig. 2B**), a finding we  
248 confirmed in a head-to-head competitive growth assay in a mixed culture with WT (**Fig. 4B**).  
249 Complementation of this double mutant with a *cikA<sup>WT</sup>* gene, or the *kaiA<sup>del</sup>* strain with *kaiA<sup>WT</sup>*  
250 expressed from a neutral site in the genome, resulted in a reversal of the respective phenotypes  
251 (**Fig. S1**). The LDC growth defects in *kaiA<sup>del</sup>* and improvement of the *kaiA<sup>del</sup>cikA* strain were  
252 reproducible when grown in liquid cultures in the same photobioreactors used to grow the library  
253 for the LDC screen (**Fig. 4C**). These results are consistent with a model in which, in the  
254 absence of KaiA, CikA is constitutively activated as a phosphatase to dephosphorylate RpaA.

255 **Arrhythmic and low *kaiBC* expression correlates with LDC phenotype.** Hallmarks of RpaA  
256 deficiency or dephosphorylation are low and arrhythmic expression from the *kaiBC* locus under  
257 CLC, as visualized using a luciferase-based reporter (*P<sub>kaiBC</sub>::luc*) (12). We used this assay to  
258 determine whether the severity of defect in LDC growth in mutants correlates with level of  
259 expression from this promoter as a proxy for RpaA phosphorylation levels. Consistent with the  
260 hypothesis, the *kaiA<sup>ins</sup>* mutant has low constitutive levels of luciferase activity, tracking near the  
261 troughs of WT circadian expression, the *kaiA* deletion mutant has almost undetectable  
262 expression, and the constitutive expression from the *kaiABC<sup>del</sup>* strain tracks near peak WT  
263 levels (**Fig. 5**). Moreover, the *kaiA<sup>del</sup>cikA* strain shows expression levels much higher than the  
264 *kaiA<sup>del</sup>* strain, approaching those observed in the *kaiABC<sup>del</sup>* mutant and around the midline of  
265 WT oscillation. Intermediate levels of growth in LDC between the *kaiA<sup>del</sup>* and *kaiA<sup>del</sup>cikA* strains  
266 were observed when a *cikA* variant (C644R) that is predicted to have reduced KaiB binding, and  
267 thus less phosphatase activation, was expressed in *trans* in the *kaiA<sup>del</sup>cikA* strain (11). Growth  
268 of this strain also displayed intermediate LDC sensitivity (**Fig. 4A**). These data support a  
269 correlation between expression from the *P<sub>kaiBC</sub>::luc* reporter strain, likely reflecting RpaA  
270 phosphorylation levels, and growth in LDC.

271 **Low RpaA phosphorylation in *kaiA*-null cells as the cause of decreased fitness.** We next  
272 directly assayed the RpaA phosphorylation levels in this group of mutants by using immunoblots  
273 and Phos-tag reagent to separate phosphorylated (P-RpaA) from unphosphorylated RpaA. As  
274 predicted, P-RpaA was low in the *kaiA<sup>ins</sup>* mutant and almost undetectable in the *kaiA<sup>del</sup>* strain  
275 (**Fig. 6A**). Adding an ectopic WT *kaiA* allele, or disrupting *cikA*, in the *kaiA<sup>del</sup>* mutant restored  
276 RpaA phosphorylation. Thus, even though adequate KaiC is present to engage SasA to  
277 phosphorylate RpaA (**Fig. 5B**), the absence of KaiA is sufficient to suppress RpaA  
278 phosphorylation. These results support the conclusion that the rescue of the *kaiA* growth defect  
279 by disrupting *cikA* is due to the elimination of CikA phosphatase activity.

280 Because the model suggests that turning on RpaA-dependent genes at dusk is critical for  
281 survival in LDC, we measured P-RpaA specifically at light-to-dark and dark-to-light transitions in  
282 *kaiA<sup>del</sup>* and *kaiA<sup>del</sup>cikA* over three diel cycles. WT has a marked pattern of high P-RpaA at dusk  
283 and low levels at dawn (**Fig. 6C**). The *kaiA<sup>del</sup>* strain had almost undetectable levels of P-RpaA,  
284 visible only when the overall RpaA signal was very high. The P-RpaA phosphorylation status in

285 the *kaiA<sup>del</sup>cikA* was restored but did not show diel variations, consistent with the arrhythmicity of  
286 *kaiA* mutants.

287 Other physiological similarities between the *kaiA*-null and *rpaA*-null strains exist. An *rpaA*  
288 mutant accumulates excessive reactive oxygen species (ROS) during the day that it is unable to  
289 alleviate during the night (15). Metabolomic analysis points towards a deficiency in reductant,  
290 needed to power detoxification reactions for photosynthetically-generated ROS, due to lack of  
291 NADPH production in the dark when OPPP genes are not activated. Likewise, levels of ROS in  
292 *kaiA<sup>del</sup>* were significantly higher at night than in WT and *kaiA<sup>del</sup>cikA* (**Fig. 6D**).

293 **Molecular basis of CikA engagement in the absence of KaiA.** The proposal that the LDC  
294 fitness defects in *kaiA* mutants result from excessive CikA phosphatase activity was derived  
295 from genetic data related to known LDC-defective mutants. However, previous studies  
296 regarding KaiA activities had not predicted this outcome. Very recent structural data, enabled  
297 through the assembly of KaiABC and KaiBC-CikA complexes, pointed to a likely mechanism:  
298 loss of competition for a binding site on KaiB that KaiA and CikA share (11). Although this  
299 hypothesis was appealing, the current model of progression of the Kai oscillator cycle could not  
300 predict this outcome. KaiA and CikA bind to a ring of KaiB that forms after KaiC has become  
301 phosphorylated at Serine 431 and Threonine 432 (44). Maturation to this state induces  
302 intramolecular changes in KaiC that expose the KaiB binding site. In the absence of KaiA, KaiC  
303 autophosphorylation is extremely abated as measured both *in vivo* (45) and *in vitro* (1-10%, **Fig.**  
304 **S5C**), so how can KaiB bind?

305 We used fluorescence anisotropy to directly determine whether KaiB can engage with KaiC in  
306 the absence of KaiA, when KaiC is mainly unphosphorylated (**Fig. 7** and **Fig. S5**). If KaiC-KaiB  
307 binding can occur, it could support binding of CikA – expected to be a necessary event for CikA  
308 phosphatase activation. This method measures the magnitude of polarization of fluorescence  
309 from KaiB tagged with a fluorophore (6-iodoacetamidofluorescein), which increases when KaiB  
310 becomes part of a larger complex. KaiC phosphomimetic mutants were used to quantify  
311 interaction of KaiB with each of the phosphostates of KaiC. Initially, we hypothesized that the  
312 KaiB binding site might become exposed on KaiC in the absence of phosphorylation when cells  
313 enter the dark and the ATP/ADP ratio is altered (46). For this reason, experiments were  
314 performed at different ATP/ADP ratios. As a control, we confirmed that no significant association  
315 of KaiB with CikA occurs in the absence of KaiC (**Fig. 7A**). However, KaiB is able to associate  
316 with hypophosphorylated WT KaiC approximately as well as with the phosphomimetic, KaiC-EA,  
317 which mimics a form of KaiC (KaiC-pST) that binds KaiB, which then forms a new ring on the N-  
318 terminal face of KaiC that captures KaiA and CikA. This binding was similar in both 1 mM ATP  
319 and 0.5 mM ATP+0.5 mM ADP conditions (**Fig. 7B**), suggesting that darkness (associated with  
320 decreased ATP/ADP *in vivo*) is not required to enable KaiB binding to KaiC. Moreover, CikA  
321 associated with KaiBC under both conditions. Association of KaiB was minimal with KaiC-AE, a  
322 mimic of the daytime state (KaiC-SpT) when KaiA is usually well-associated with the A-loops of  
323 KaiC in an interaction that does not require KaiB. However, the presence of CikA enhanced the  
324 binding of KaiB to KaiC-AE, presumably due to formation of a KaiC-KaiB-CikA complex. For the  
325 WT KaiC experiments in **Fig. 7**, KaiB (0.05  $\mu$ M) is most likely binding to the small percentage (1-  
326 10%) of the KaiC population that remains phosphorylated (0.04-0.4  $\mu$ M). *In vivo*, it is likely that  
327 in the absence of KaiA, KaiB also binds selectively to a phosphorylated fraction of the  
328 hypophosphorylated KaiC pool.

329 These data generally match the patterns expected for the current oscillator model; however,  
330 they also demonstrate that the KaiC-KaiB-CikA complex can form in the absence of KaiA, when  
331 the KaiC pool is hypophosphorylated, and that the ATP ratio (mimicking day and night) has little  
332 effect on this association. Furthermore, they support the competitive binding of KaiA and CikA to  
333 the KaiB ring. These observations are consistent with the proposal that the low survival rate of

334 *kaiA-null* mutants is due to over-stimulation of CikA phosphatase activity, stripping the cell of P-  
335 RpaA and disabling expression of the critical night-time reductant-producing OPPP.

## 336 Discussion

337 Recent research and interest in growth of cyanobacteria in LDC conditions (15, 16, 20, 22, 47–  
338 49) provides a rich dataset to inform engineering strategies, to model metabolic flux predictions,  
339 and to elucidate the intersection of the clock and cell physiology. While previous studies have  
340 identified a handful of genes important for growth in LDC, the conditional defect of these  
341 mutants was determined from targeted studies that left large unknowns in the pathways  
342 important for LDC. This study used an unbiased quantitative method to comprehensively query  
343 the *S. elongatus* genome for the full set of genes that are specifically necessary to survive the  
344 night. This approach eliminated the requirement to test individual mutants for a scorable  
345 phenotype under diel conditions and allowed for the discovery of genes that would not be  
346 predicted to have such a phenotype. In addition to identifying genes of pathways previously  
347 unknown to be involved in LDC, this screen also strongly reinforced two emerging stories from  
348 recent research: the breakdown of glycogen and flux through the OPPP, the major source of  
349 reductant under non-photosynthetic conditions, is essential (15, 16); and, the role of the clock is  
350 repressive, rather than enabling (12), as its complete elimination has little consequence in LDC,  
351 but its constitutive output signaling is harmful under these conditions because of its negative  
352 effect on the OPPP genes.

353 A boon of the Rb-TnSeq data is in how it reveals non-intuitive insights into the regulatory  
354 measures cells need for growth in specific conditions. One such discovery is that a *kaiA* mutant  
355 is severely LDC sensitive. Investigation of the mechanism that underlies this phenotype led to  
356 increased understanding of the function of the Kai oscillator, a nanomachine whose structural  
357 interactions have been revealed with an unusual degree of clarity (11, 50). KaiA is  
358 conventionally thought to have a specific daytime role in stimulating KaiC autophosphorylation –  
359 an activity that promotes SasA stimulation and brings about the conformational change in KaiC  
360 that enables KaiB engagement (**Fig. 8A**). This latter step ushers in the KaiC dephosphorylation  
361 phase, during which KaiA is a passive, inactive player. Results from this study provide a new  
362 perspective of KaiA in its KaiB-bound form as regulating the night-time clock output by its  
363 competition with CikA for KaiB-binding (**Fig. 8B**). A cell without KaiA leaves the major  
364 transcription factor RpaA hypophosphorylated for two reasons. First, without KaiC undergoing  
365 its daytime phosphorylation cycle, SasA engagement with the oscillator is diminished, reducing  
366 its kinase activity acting on RpaA. Secondly, without KaiA present as a competitor, the  
367 opportunities for CikA binding on KaiB-KaiC complexes increase, leading to hyperactive  
368 phosphatase activity and ultimately eliminating any chance for phosphorylated RpaA to  
369 accumulate. The result is a severe decrease in fitness in LDC. However, cells without KaiA and  
370 CikA (and even without KaiABC) have ample P-RpaA, indicating that other pathways contribute  
371 to the phosphorylation of RpaA. This fact emphasizes the counterintuitive point that activation of  
372 CikA phosphatase in the night-time complex, rather than activation of SasA kinase, is the key  
373 signaling state of the cyanobacterial clock (12).

374 The screen revealed expected mutants as well. Although a *kaiC* mutant does not have a notable  
375 LDC defect in pure culture, it is known to do poorly in LDC when grown in a population with  
376 other cells that have a functioning circadian rhythm, as is the case in the pooled growth scenario  
377 used here, illustrating soft selection for circadian rhythms in cyanobacteria (1). As expected,  
378 *kaiC* scored as deficient in LDC, but not as severely as many other mutants. One of the most  
379 severely LDC-defective mutants we know of is *rpaA*, which dies within a few hours of dark  
380 exposure and requires special handling in the lab. Strains with disruptions in *rpaA* did score as  
381 negative, but only to a moderate degree (-0.7). This discrepancy between severe known  
382 phenotype and moderate score can be attributed to the fact that *rpaA* mutants were also less fit



383 than the population in CLC, decreasing its magnitude of relative fitness in LDC, similar to the  
384 situation for mutants defective in glycogen anabolic processes.

385 Importantly, the screen also identified an equivalent list of genes whose loss improves growth in  
386 LDC. Although not the target of the current study, these genes have great potential for providing  
387 new insights into *S. elongatus* diurnal physiology and perhaps improved genetic backgrounds  
388 for metabolic engineering. In contrast to many of the mutants that negatively affect LDC growth,  
389 the list of top positive mutants includes many genes with less transparent roles in LDC  
390 conditions, including some that carry no functional annotation. The phenotype may be  
391 attributable to a specific pathway or may result from the additive effects of many unrelated  
392 genes whose expression is altered in a regulon indirectly. Some mutants may outcompete  
393 others in the population because they have alleviated photochemical intermediate buildup or  
394 lessened the uptake of harmful metabolites in the medium. The scant information available  
395 regarding these pathways makes it difficult to predict why their value would be different in CLC  
396 vs. LDC.

397 In summary, this study has improved our understanding of the mechanism of core oscillator  
398 protein interactions and generated a comprehensive map of genetic pathways needed for  
399 survival in LDC in *S. elongatus*. We have shown that KaiA, originally thought to only regulate  
400 KaiC autophosphorylation, also modulates CikA-mediated clock output. More broadly, the use of  
401 RB-TnSeq on a dense transposon library in this study has identified the genes in the genome  
402 necessary for growth in alternating light-dark conditions, established a firm connection between  
403 circadian clock regulation and the metabolic pathways critical for fitness in more natural  
404 environments, and contributed to a more complete picture of the finely balanced mechanisms  
405 that underlie circadian clock output.

406

## 407 **Materials and Methods**

408 **Bacterial strains and culture conditions.** All cultures were constructed using WT *S. elongatus*  
409 PCC 7942 stored in our laboratory as AMC06. Cultures (**Table S1**) were grown at 30 °C using  
410 either BG-11 liquid or solid medium with antibiotics as needed for selection at standard  
411 concentrations: 20 µg/mL for kanamycin (Km) and gentamicin (Gm), 22 µg/mL for  
412 chloramphenicol (Cm), and 10 µg/mL each for spectinomycin and streptomycin (SpSm) (51).  
413 Liquid cultures were either cultivated in 100 mL volumes in 250 mL flasks shaken at ~150 rpm  
414 on an orbital shaker or in 400 mL volume in top-lit bioreactors (Phenometrics Inc. ePBR  
415 photobioreactors version 1.1) mixed via filtered ambient-air bubble agitation with a flow rate of  
416 0.1 mL per min at 30 °C. Viable cell plating for LDC-sensitivity testing and quantification of  
417 cellular ROS were performed as previously described (15). Spot-plate growth was quantified by  
418 converting the plate image to 8-bit and performing densitometric analyses using National  
419 Institutes of Health ImageJ software (52). Transformation was performed following standard  
420 protocols (53). Strains were checked periodically for contamination using BG-11 Omni plates  
421 (BG-11 supplemented with 0.04% glucose and 5% LB) (53). Verification of the disruption of the  
422 *kaiA* gene in mutants was performed by PCR and is shown in **Fig. S1**. For immunoblotting  
423 experiments and ROS measurements cultures were grown in flasks. Samples for protein were  
424 taken after 3 light-dark cycles at specified time points immediately before the lights turned on  
425 and turned off.

426 **One-on-one competition experiments.** The relative fitness of *cikA* null and *cikA*<sup>+</sup> strains was  
427 assessed in growth competition experiments that leveraged different antibiotic resistance  
428 markers in the strains. The *cikA* mutant carries a Gm-resistance marker inserted in the *cikA*  
429 locus. AMC06 was transformed with pAM1579 to generate a Km-resistant strain that carries the

430 drug cassette in neutral site II (designated as “WT-Km<sup>R</sup>” for this experiment). The axenic  
431 cultures were grown to OD<sub>750</sub> ~ 0.4, washed three times with BG-11 via centrifugation at 4,696  
432 G for 10 min to remove antibiotics, and diluted with BG-11 to an OD<sub>750</sub> of 0.015. Cultures were  
433 then mixed in a 1:1 ratio and grown without antibiotics for 8 days under ~100 μmol photos· m<sup>2</sup>  
434 · s<sup>-1</sup> light. To assay survival of each genotype at 0, 3, and 8 days, mixed cultures were diluted  
435 using a 1:10 dilution series and plated in 20 μL spots in duplicate onto ~2 mL of BG-11 agar  
436 with either Gm or Km poured in the wells of a 24-well microplate. CFU’s of each strain were  
437 calculated from the dilution series across the two antibiotic regimes and were used to determine  
438 the percentage of each strain in the mixture population over time. To ensure that the expression  
439 of the antibiotic markers did not influence fitness, WT cultures that carried each drug-resistance  
440 marker (Km in neutral site II via plasmid pAM1579 or Gm in neutral site III via plasmid  
441 pAM5328) were grown together and assayed, and displayed no significant differences (**Fig. S2**).

442 **Rb-Tnseq Assay.** Samples of the library archived at -80 C were quickly thawed in a 37 C water  
443 bath for 2 min and then divided into three flasks of 100 mL BG-11 with Km, and incubated at 30  
444 °C in 30 μmol photos· m<sup>2</sup>· s<sup>-1</sup> light for 1 day without shaking. The library culture was then  
445 moved to 70 μmol photos· m<sup>2</sup>· s<sup>-1</sup> light on an orbital shaker till OD<sub>750</sub> reached ~0.3. The  
446 cultures were then combined, diluted to starting density of OD<sub>750</sub> 0.025, and 4 replicates of 15  
447 mL were spun down at 4,696 g and frozen at -80 °C as Time 0 samples to determine population  
448 baseline. After transferring to bioreactors, CLC bioreactors were set for continuous light at 500  
449 μmol photos· m<sup>2</sup>· s<sup>-1</sup> and LDC bioreactors were set to a square-wave cycle consisting of 12 h  
450 light - 12 h dark. Bioreactors were set to run in turbidostat mode maintaining the density at  
451 OD<sub>750</sub> = 0.1. Bioreactors were sampled after approximately 6 generations: the CLC reactors  
452 after 3 days (three 24-h light periods) and LDC reactors after 4 days (four 12-h light-12-h dark  
453 light dark periods). Two of the three biological replicates for each condition were performed  
454 concurrently (using 4 bioreactors) while a third was performed later using the same procedure  
455 and conditions.

456 **Bioluminescence monitoring.** Flask-grown batch cultures that reached a density of OD<sub>750</sub> =  
457 0.3-0.4 were diluted as needed to OD<sub>750</sub> of 0.3 and 20 μL of each culture was placed on a pad  
458 of BG-11 agar containing 10 μL of 100 mM firefly luciferin, in a well of a 96-well dish. Plates  
459 were covered with clear tape to prevent drying and holes were poked using a sterile needle to  
460 allow air transfer. Cultures were synchronized by incubating the plate under permissive LDC  
461 conditions (0 and 30 μmol photos· m<sup>2</sup>· s<sup>-1</sup> light) for 3 days, and then returned to constant light  
462 (LL) conditions for bioluminescence sampling by a Packard TopCount luminometer  
463 (PerkinElmer Life Sciences). Bioluminescence of P<sub>kaiBC</sub>::*luc* firefly luciferase fusion reporter was  
464 monitored at 30 °C under CLC as described previously (54). Data were analyzed with the  
465 Biological Rhythms Analysis Software System (<http://millar.bio.ed.ac.uk/pebrown/brass/brasspage.htm>) import and analysis program using Microsoft Excel. Results shown are  
466 the average of four biological replicate wells located in the innermost section of the plate, where  
467 drying is minimal.  
468

469 **Protein sample preparation and gel electrophoresis, and Phos-tag acrylamide gels.**  
470 Protein was isolated from cells and diluted to final loading concentration of 5 μg/well for RpaA  
471 analysis and 10 μg/well for KaiC analysis (55). SDS/PAGE was performed according to  
472 standard methods with the following exceptions. Phosphorylation of RpaA was detected using  
473 10% SDS-polyacrylamide gels supplemented with Phos-tag ligand (Wako Chemicals USA) at a  
474 final concentration of 25 μM and manganese chloride at a final concentration of 50 μM. Gels

475 were incubated once for 10 min in transfer buffer supplemented with 100 mM EDTA, followed by  
476 a 10-min incubation in transfer buffer without EDTA before standard wet transfer. Protein  
477 extracts and the electrophoretic apparatus were chilled to minimize hydrolysis of heat-labile  
478 phospho-Asp. Protein extracts for use in Phos-tag gels were prepared in Tris-buffered saline,  
479 and extracts for standard SDS/PAGE were prepared in PBS. RpaA antiserum (a gift from E.  
480 O'Shea, Harvard University, Cambridge, MA) was used at a dilution of 1:2,000 and secondary  
481 antibody (goat anti-rabbit IgG, Calbiochem Cat # 401315) at 1:5000. KaiC immunoblotting was  
482 performed similarly using KaiC antiserum diluted to 1:2000 and secondary antibody diluted to  
483 1:10,000 (Horseradish Peroxidase-labeled goat anti-chicken IgY, Aves Labs, Cat # H-1004)  
484 (56). Densitometric analyses were performed using National Institutes of Health ImageJ  
485 software (52) (**Fig. S3, Dataset S3**). Samples were immediately stored at -80 °C, thawed once,  
486 and always kept on ice.

### 487 ***Fitness calculations***

488 Of the 2,723 genes comprising the genome of *S. elongatus* 718 are essential, and mutants in  
489 the essential genes are not present in the library (24). To estimate the fitness effects of gene  
490 disruptions in LDC relative to CLC, we developed an analysis pipeline of curating the data from  
491 the 2,005 nonessential genes, normalizing it, and then analyzing it using linear models (**Dataset**  
492 **S1**). We first counted the number of reads for each sample to use as a normalizing factor  
493 between samples. Bar codes are dispersed across the genome, and we removed any bar code  
494 falling outside of a gene (24,868 bar codes out of 154,949 total bar codes) or within a gene but  
495 not within the middle 80% (27,763/154,949). Based on the bar codes remaining, we removed  
496 any gene not represented by at least three bar codes in different positions (114 genes out of  
497 2,075 total). This filtering left us with 102,136 bar codes distributed across 1,961 genes.

498 For each bar code in each sample we added a pseudocount of one to the number of reads,  
499 divided by the total number of reads for the sample as calculated before, and took the log-2  
500 transformation of this sample-normalized number of reads. The experiment involved two  
501 different starting pools of strains (called T0), each of which was divided into CLC and LDC  
502 samples. To account for different starting percentages of each bar code within the T0 pools, we  
503 averaged the log-2 transformed values for a bar code across the four replicate T0 samples for  
504 each pool then subtracted these average starting bar-code values from the CLC and LDC  
505 values in the respective pools. We also removed any gene without at least 15 T0 reads (across  
506 the four replicates and before adding the pseudocount) in each pool (89/1,961), leaving 1,872  
507 genes and 101,258 bar codes.

508 For each gene, we used maximum likelihood to fit a pair of nested linear mixed effects models  
509 to the sample- and read-normalized log-2 transformed counts:

510

$$511 \quad (1) \ y_{i,j,k} = \mu_g + C_j + B_i + \varepsilon_{i,j,k}; \ B_i \sim iid \ N(0, \zeta_g^2); \ \varepsilon_{i,j,k} \sim iid \ N(0, \sigma_g^2)$$

512

$$513 \quad (2) \ y_{i,j,k} = \mu_g + B_i + \varepsilon_{i,j,k}; \ B_i \sim iid \ N(0, \zeta_g^2); \ \varepsilon_{i,j,k} \sim iid \ N(0, \sigma_g^2)$$

514

515 where  $y_{i,j,k}$  is the normalized log-2 value for bar code  $i$  in gene  $g$  in condition  $j$  for sample  $k$ ,  $\mu_g$  is  
516 the average value for the gene,  $C_j$  is the fixed effect of condition  $j$ ,  $B_i$  is a random effect for bar  
517 code  $i$ , and  $\varepsilon_{i,j,k}$  is the residual. We identified genes with significant fitness differences between  
518 conditions by comparing the difference in the  $-2 \cdot \log$  likelihoods of the models to a chi-square  
519 distribution with one degree of freedom, estimating a p-value, accounting for multiple testing by  
520 the false-discovery rate method of Benjamini and Hochberg (57), and selecting those gene with

521 adjusted p-values less than 0.01. We took the contrast  $C_{LDC} - C_{CLC}$  to be the estimated LDC-  
522 specific fitness effect of knocking out the gene (**Dataset S2**).

523 Results obtained across biological replicates and across similar screens performed in either  
524 batch cultures grown in 250 mL Erlenmeyer shake flasks and on solid agar on Petri plates were  
525 consistent (**Fig. S4, Dataset S4**). Mutants that had estimated fitness scores below a confidence  
526 threshold (associated FDR adjusted p-value <0.01) (**Dataset S2**) were not considered. Mutants  
527 with gene disruptions that had an LDC fitness score  $\geq 1.0$  or  $\leq -1.0$  with a false discovery rate  $\leq$   
528 1% were classified having strong fitness phenotype specific to growth in LDC, and those with a  
529 fitness score of  $< 1.0$  but  $\geq 0.5$  and  $> -1.0$  but  $\leq -0.5$  were classified as causing a moderate  
530 fitness phenotype. Fitness scores  $< 0.5$  and  $> -0.5$  were categorized as negligent/minor, i.e., little  
531 change in abundance over the course of the experiment in LDC vs. CLC.

532 **Fluorescence Spectroscopy.** To monitor the formation of the CikA activating complex,  
533 fluorescence anisotropy measurements were performed at 30 °C on an ISS PC1  
534 spectrofluorometer equipped with a three-cuvette sample compartment, at excitation and  
535 emission wavelengths of 492 nm and 530 nm, respectively, for samples including 6-  
536 iodoacetamidofluorescein (6-IAF) labeled KaiB-FLAG-K251C alone (0.05  $\mu$ M), and its mixtures  
537 with KaiC (4  $\mu$ M) or FLAG-CikA (4  $\mu$ M) or KaiC (4  $\mu$ M) + FLAG-CikA (4  $\mu$ M). Each sample (400  
538  $\mu$ L) was either in an ATP buffer [20 mM Tris, 150 mM NaCl, 5 mM MgCl<sub>2</sub>, 1 mM ATP, 0.5 mM  
539 EDTA, 0.25 mM TCEP (tris(2-carboxyethyl)phosphine), pH 8.0] or in ATP/ADP buffer [20 mM  
540 Tris, 150 mM NaCl, 5 mM MgCl<sub>2</sub>, 0.5 mM ATP, 0.5 mM ADP, 0.5 mM EDTA, 0.25 mM TCEP,  
541 pH 8.0]. TCEP was introduced from the FLAG-CikA stock [20 mM Tris, 150 mM NaCl, 5 mM  
542 TCEP, pH 8.0]. KaiB stock was in the buffer [20 mM Tris, 150 mM NaCl, pH 8.0] and KaiC stock  
543 in the buffer [20 mM Tris, 150 mM NaCl, 5 mM MgCl<sub>2</sub>, 1 mM ATP, 0.5 mM EDTA, pH 8.0].

544 The KaiC samples included freshly dephosphorylated WT KaiC, and KaiC phosphomimetics  
545 KaiC-AE and KaiC-EA. To prepare the freshly dephosphorylated KaiC, WT KaiC at 20  $\mu$ M in the  
546 buffer [20 mM Tris, 150 mM NaCl, 5 mM MgCl<sub>2</sub>, 1 mM ATP, 0.5 mM EDTA, pH 8.0] was  
547 incubated at 30 °C for 24 hours before the fluorescence binding assays. SDS-PAGE analysis  
548 was performed to determine KaiC and CikA stability and KaiC phosphorylation levels (**Fig. S5,**  
549 **Dataset S5**).

550

## 551 **Acknowledgments**

552 This work was supported by research grants (R35GM118290 to SSG; R01GM107521 to AL) and  
553 training grants (T32GM007240 to BER and SD) from the National Institutes of Health and the  
554 National Science Foundation (MCB1517482 to SAR).

555

## 556 **References**

- 557 1. Ouyang Y, Andersson CR, Kondo T, Golden SS, Johnson CH (1998) Resonating circadian  
558 clocks enhance fitness in cyanobacteria. *Proc Natl Acad Sci U S A* 95(15):8660–8664.
- 559 2. Woelfle MA, Ouyang Y, Phanvijhitsiri K, Johnson CH (2004) The adaptive value of  
560 circadian clocks: an experimental assessment in cyanobacteria. *Curr Biol* 14(16):1481–  
561 1486.
- 562 3. Lambert G, Chew J, Rust MJ (2016) Costs of Clock-Environment Misalignment in Individual  
563 Cyanobacterial Cells. *Biophys J* 111(4):883–891.
- 564 4. Yerushalmi S, Yakir E, Green RM (2011) Circadian clocks and adaptation in *Arabidopsis*.  
565 *Mol Ecol* 20(6):1155–1165.
- 566 5. Dodd AN, et al. (2005) Plant circadian clocks increase photosynthesis, growth, survival,  
567 and competitive advantage. *Science* 309(5734):630–633.
- 568 6. Morris CJ, Yang JN, Scheer FAJL (2012) The impact of the circadian timing system on  
569 cardiovascular and metabolic function. *Prog Brain Res* 199:337–358.
- 570 7. Kelleher FC, Rao A, Maguire A (2014) Circadian molecular clocks and cancer. *Cancer Lett*  
571 342(1):9–18.
- 572 8. Kim JH, Duffy JF (2018) Circadian Rhythm Sleep-Wake Disorders in Older Adults. *Sleep*  
573 *Med Clin* 13(1):39–50.
- 574 9. Chaix A, Zarrinpar A, Panda S (2016) The circadian coordination of cell biology. *J Cell Biol*  
575 215(1):15–25.
- 576 10. Nakajima M, et al. (2005) Reconstitution of circadian oscillation of cyanobacterial KaiC  
577 phosphorylation in vitro. *Science* 308(5720):414–415.
- 578 11. Tseng R, et al. (2017) Structural basis of the day-night transition in a bacterial circadian  
579 clock. *Science* 355(6330):1174–1180.
- 580 12. Paddock ML, Boyd JS, Adin DM, Golden SS (2013) Active output state of the  
581 *Synechococcus* Kai circadian oscillator. *Proc Natl Acad Sci U S A* 110(40):E3849–57.
- 582 13. Gutu A, O’Shea EK (2013) Two antagonistic clock-regulated histidine kinases time the  
583 activation of circadian gene expression. *Mol Cell* 50(2):288–294.
- 584 14. Markson JS, Piechura JR, Puszynska AM, O’Shea EK (2013) Circadian control of global  
585 gene expression by the cyanobacterial master regulator RpaA. *Cell* 155(6):1396–1408.
- 586 15. Diamond S, et al. (2017) Redox crisis underlies conditional light-dark lethality in  
587 cyanobacterial mutants that lack the circadian regulator, RpaA. *Proc Natl Acad Sci U S A*  
588 114(4):E580–E589.
- 589 16. Puszynska AM, O’Shea EK (2017) Switching of metabolic programs in response to light  
590 availability is an essential function of the cyanobacterial circadian output pathway. *Elife* 6.  
591 doi:10.7554/eLife.23210.

- 592 17. Swan JA, Golden S, LiWang A, Partch CL (2018) Structure, function, and mechanism of the  
593 core circadian clock in cyanobacteria. *J Biol Chem*. doi:10.1074/jbc.TM117.001433.
- 594 18. Iwasaki H, et al. (2000) A *kaiC*-interacting sensory histidine kinase, SasA, necessary to  
595 sustain robust circadian oscillation in cyanobacteria. *Cell* 101(2):223–233.
- 596 19. Boyd JS, Bordowitz JR, Bree AC, Golden SS (2013) An allele of the *crm* gene blocks  
597 cyanobacterial circadian rhythms. *Proc Natl Acad Sci U S A* 110(34):13950–13955.
- 598 20. Diamond S, Jun D, Rubin BE, Golden SS (2015) The circadian oscillator in *Synechococcus*  
599 *elongatus* controls metabolite partitioning during diurnal growth. *Proc Natl Acad Sci U S A*  
600 112(15):E1916–25.
- 601 21. Gründel M, Scheunemann R, Lockau W, Zilliges Y (2012) Impaired glycogen synthesis  
602 causes metabolic overflow reactions and affects stress responses in the cyanobacterium  
603 *Synechocystis* sp. PCC 6803. *Microbiology* 158(Pt 12):3032–3043.
- 604 22. Puszynska AM, O’Shea EK (2017) ppGpp Controls Global Gene Expression in Light and in  
605 Darkness in *S. elongatus*. *Cell Rep* 21(11):3155–3165.
- 606 23. Hood RD, Higgins SA, Flamholz A, Nichols RJ, Savage DF (2016) The stringent response  
607 regulates adaptation to darkness in the cyanobacterium *Synechococcus elongatus*. *Proc*  
608 *Natl Acad Sci U S A* 113(33):E4867–76.
- 609 24. Rubin BE, et al. (2015) The essential gene set of a photosynthetic organism. *Proc Natl*  
610 *Acad Sci U S A* 112(48):E6634–43.
- 611 25. Broddrick JT, et al. (2016) Unique attributes of cyanobacterial metabolism revealed by  
612 improved genome-scale metabolic modeling and essential gene analysis. *Proc Natl Acad*  
613 *Sci U S A* 113(51):E8344–E8353.
- 614 26. Wetmore KM, et al. (2015) Rapid quantification of mutant fitness in diverse bacteria by  
615 sequencing randomly bar-coded transposons. *MBio* 6(3):e00306–15.
- 616 27. Vijayan V, Zuzow R, O’Shea EK (2009) Oscillations in supercoiling drive circadian gene  
617 expression in cyanobacteria. *Proc Natl Acad Sci U S A* 106(52):22564–22568.
- 618 28. Miao X, Wu Q, Wu G, Zhao N (2003) Changes in photosynthesis and pigmentation in an  
619 *agp* deletion mutant of the cyanobacterium *Synechocystis* sp. *Biotechnol Lett* 25(5):391–  
620 396.
- 621 29. Li X, Shen CR, Liao JC (2014) Isobutanol production as an alternative metabolic sink to  
622 rescue the growth deficiency of the glycogen mutant of *Synechococcus elongatus* PCC  
623 7942. *Photosynth Res* 120(3):301–310.
- 624 30. Porankiewicz J, Clarke AK (1997) Induction of the heat shock protein ClpB affects cold  
625 acclimation in the cyanobacterium *Synechococcus* sp. strain PCC 7942. *J Bacteriol*  
626 179(16):5111–5117.
- 627 31. Gill RT, et al. (2002) Genome-wide dynamic transcriptional profiling of the light-to-dark  
628 transition in *Synechocystis* sp. strain PCC 6803. *J Bacteriol* 184(13):3671–3681.
- 629 32. Hagemann M, Vinnemeier J, Oberpichler I, Boldt R, Bauwe H (2005) The glycine

- 630 decarboxylase complex is not essential for the cyanobacterium *Synechocystis* sp. strain  
631 PCC 6803. *Plant Biol* 7(1):15–22.
- 632 33. Hackenberg C, et al. (2009) Photorespiratory 2-phosphoglycolate metabolism and  
633 photoreduction of O<sub>2</sub> cooperate in high-light acclimation of *Synechocystis* sp. strain PCC  
634 6803. *Planta* 230(4):625–637.
- 635 34. Cohen SE, Golden SS (2015) Circadian Rhythms in Cyanobacteria. *Microbiol Mol Biol Rev*  
636 79(4):373–385.
- 637 35. Ishiura M, et al. (1998) Expression of a gene cluster *kaiABC* as a circadian feedback  
638 process in cyanobacteria. *Science* 281(5382):1519–1523.
- 639 36. Nishiwaki T, et al. (2004) Role of KaiC phosphorylation in the circadian clock system of  
640 *Synechococcus elongatus* PCC 7942. *Proc Natl Acad Sci U S A* 101(38):13927–13932.
- 641 37. Xu Y, et al. (2004) Identification of key phosphorylation sites in the circadian clock protein  
642 KaiC by crystallographic and mutagenetic analyses. *Proc Natl Acad Sci U S A*  
643 101(38):13933–13938.
- 644 38. Williams SB, Vakonakis I, Golden SS, LiWang AC (2002) Structure and function from the  
645 circadian clock protein KaiA of *Synechococcus elongatus*: a potential clock input  
646 mechanism. *Proc Natl Acad Sci U S A* 99(24):15357–15362.
- 647 39. Ditty JL, Canales SR, Anderson BE, Williams SB, Golden SS (2005) Stability of the  
648 *Synechococcus elongatus* PCC 7942 circadian clock under directed anti-phase expression  
649 of the *kai* genes. *Microbiology* 151(Pt 8):2605–2613.
- 650 40. Nair U, Ditty JL, Min H, Golden SS (2002) Roles for sigma factors in global circadian  
651 regulation of the cyanobacterial genome. *J Bacteriol* 184(13):3530–3538.
- 652 41. Schmitz O, Katayama M, Williams SB, Kondo T, Golden SS (2000) CikA, a  
653 bacteriophytochrome that resets the cyanobacterial circadian clock. *Science*  
654 289(5480):765–768.
- 655 42. Chen Y, et al. (2009) A novel allele of *kaiA* shortens the circadian period and strengthens  
656 interaction of oscillator components in the cyanobacterium *Synechococcus elongatus* PCC  
657 7942. *J Bacteriol* 191(13):4392–4400.
- 658 43. Kutsuna S, Nakahira Y, Katayama M, Ishiura M, Kondo T (2005) Transcriptional regulation  
659 of the circadian clock operon *kaiBC* by upstream regions in cyanobacteria. *Mol Microbiol*  
660 57(5):1474–1484.
- 661 44. Chang Y-G, et al. (2015) Circadian rhythms. A protein fold switch joins the circadian  
662 oscillator to clock output in cyanobacteria. *Science* 349(6245):324–328.
- 663 45. Kitayama Y, Iwasaki H, Nishiwaki T, Kondo T (2003) KaiB functions as an attenuator of  
664 KaiC phosphorylation in the cyanobacterial circadian clock system. *EMBO J* 22(9):2127–  
665 2134.
- 666 46. Rust MJ, Golden SS, O’Shea EK (2011) Light-driven changes in energy metabolism directly  
667 entrain the cyanobacterial circadian oscillator. *Science* 331(6014):220–223.

- 668 47. Ito H, et al. (2009) Cyanobacterial daily life with Kai-based circadian and diurnal genome-  
669 wide transcriptional control in *Synechococcus elongatus*. *Proc Natl Acad Sci U S A*  
670 106(33):14168–14173.
- 671 48. Matson MM, Atsumi S (2017) Photomixotrophic chemical production in cyanobacteria. *Curr*  
672 *Opin Biotechnol* 50:65–71.
- 673 49. McEwen JT, Kanno M, Atsumi S (2016) 2,3 Butanediol production in an obligate  
674 photoautotrophic cyanobacterium in dark conditions via diverse sugar consumption. *Metab*  
675 *Eng* 36:28–36.
- 676 50. Snijder J, et al. (2017) Structures of the cyanobacterial circadian oscillator frozen in a fully  
677 assembled state. *Science* 355(6330):1181–1184.
- 678 51. Taton A, et al. (2014) Broad-host-range vector system for synthetic biology and  
679 biotechnology in cyanobacteria. *Nucleic Acids Res* 42(17):e136.
- 680 52. Schneider CA, Rasband WS, Eliceiri KW (2012) NIH Image to ImageJ: 25 years of image  
681 analysis. *Nat Methods* 9(7):671–675.
- 682 53. Clerico EM, Ditty JL, Golden SS (2007) Specialized techniques for site-directed  
683 mutagenesis in cyanobacteria. *Methods Mol Biol* 362:155–171.
- 684 54. Mackey SR, Golden SS, Ditty JL (2011) The itty-bitty time machine genetics of the  
685 cyanobacterial circadian clock. *Adv Genet* 74:13–53.
- 686 55. Ivleva NB, Golden SS (2007) Protein extraction, fractionation, and purification from  
687 cyanobacteria. *Methods Mol Biol* 362:365–373.
- 688 56. Dong G, et al. (2010) Elevated ATPase activity of KaiC applies a circadian checkpoint on  
689 cell division in *Synechococcus elongatus*. *Cell* 140(4):529–539.
- 690 57. Benjamini Y, Hochberg Y (1995) Controlling the False Discovery Rate: A Practical and  
691 Powerful Approach to Multiple Testing. *J R Stat Soc Series B Stat Methodol* 57(1):289–300.
- 692 58. Ditty JL, Williams SB, Golden SS (2003) A cyanobacterial circadian timing mechanism.  
693 *Annu Rev Genet* 37:513–543.

694

695



## 696 **Figure Legends**

697

698 **Fig 1. Using RB-TnSeq to assess genetic contributions to fitness in LDC.** A dense pooled  
699 mutant library containing unique known bar-code identification sequences linked to each  
700 individual gene insertion was used to estimate the fitness of each loss-of-function mutant grown  
701 under alternating light-dark conditions. The library was grown under continuous light and  
702 sampled to determine the baseline abundance of each strain in the population prior to transfer  
703 to photobioreactors which were then either exposed to continuous light or alternating 12-h light -  
704 12-h dark regimes. Bar-code quantification of the library population in both conditions was  
705 normalized to the baseline and compared against each other to estimate the fitness  
706 consequences of loss of function of each gene specific to growth in LDC.

707

708 **Fig 2. LDC Rb-TnSeq screen results breakdown.** (A) Of the 2723 genes in the genome, 1872  
709 genes were analyzed in the library population. Of those, data from mutants with loss-of-function  
710 of 1420 genes fell below our false discovery threshold. Of the remaining 452 genes, 220 had  
711 moderate to strong fitness effects. (B) A volcano plot highlighting genes of interest. Red-shaded  
712 region indicates an estimated fitness decrease in LDC and the green-shaded region indicates a  
713 fitness increase. (C) Functional category composition of genes that gave strong fitness scores.  
714 Categories based on COG classification or GO ID. Green corresponds to strong fitness  
715 increases; Red corresponds to strong fitness decreases.

716 **Fig. 3. Connection between essential night-time metabolism and RpaA regulation.** (A) A  
717 metabolic map showing the reactions (red) that are controlled by genes that are essential in  
718 LDC. Reactions that are non-essential (solid arrows) or essential (dashed arrows) in CLC are  
719 also indicated. Stars mark NADPH-generating reactions. \* gene was not revealed in the  
720 screen but is known to be required in LDC; # minor LDC decrease measured, likely due to  
721 fitness contribution in CLC which affects calculation (B) LDC-sensitive mutant population  
722 enriched for genes known to be positively regulated by RpaA.

723 **Fig. 4. *kaiA* mutant growth and *cikA*-based intervention in LDC.** (A) Dilution spot-plate  
724 growth of strains in CLC and LDC. A representation of the genotype of each strain is portrayed  
725 next to each dilution series. Shaded grey bar at end of *kaiA* = negative regulatory element. (B)  
726 *cikA* mutant fitness increase in competition with WT in LDC and CLC. (C) Growth of liquid  
727 cultures in replicate photobioreactors in LDC. Vertical shaded areas represent dark conditions.  
728 Shaded areas around each line = standard deviation of biological replicates.

729 **Fig. 5. Bioluminescence levels from *kaiBC* reporter in mutant backgrounds.** The intensity  
730 of  $P_{kaiBC}::luc$  output signal correlates with LDC sensitivity. Rhythms were measured in CLC  
731 conditions driven by the *kaiBC* promoter after exposure to 72 h of entraining LDC that includes a  
732 low-light intensity that is permissive for the mutants. Shaded areas around each line = standard  
733 deviation of biological replicates.

734 **Fig. 6. RpaA status correlates with growth success in LDC.** (A) RpaA phosphorylation at  
735 dusk (after 12 h light) showing average  $\pm$  SD values. Letters indicate groupings from ANOVA  
736 analysis. (B) Levels of KaiC from cells taken at dusk. C. RpaA phosphorylation across the light-  
737 dark transitions beginning with dawn. (D)  $H_2DCFDA$  fluorescence over a 12-h dark period during  
738 an LDC, indicating total cellular ROS in WT, *kaiA<sup>del</sup>*, and *kaiA<sup>del</sup>cikA*. The shaded area indicates  
739 the period of darkness following a 12-h light period. P-RpaA denotes phosphorylated protein.

740 **Fig. 7. CikA-activating complex formation.** (A) Fluorescence anisotropy of the binding  
741 kinetics of 6-IAF-labeled KaiB (black) to WT KaiC, KaiA-AE, or KaiC-EA (red in each case) with  
742 and without CikA (blue), and in the presence of 0.5 mM ATP + 0.5 mM ADP. (B) Binding of KaiB  
743 (black) to WT KaiC or KaiC-AE (red in each case) with and without CikA (blue) in the presence  
744 of 1.0 mM ATP.

745 **Fig. 8. Model for LDC sensitivity due to circadian clock dysfunction.** (A) Conventionally, the  
746 role of KaiA is primarily to bind to the A-loops of the CII domain of KaiC, stimulating its  
747 autophosphorylation and consequently increasing the activity of the kinase SasA; this activity in  
748 turn results in accumulation of phosphorylated RpaA throughout the day. P-RpaA initiates the  
749 expression of circadian-controlled night-time class 1 genes at dusk. (B) Without KaiA, KaiC  
750 phosphorylation is suppressed and, thus, SasA kinase activity is diminished, reducing the pools  
751 of SasA-mediated P-RpaA. Upon KaiC-KaiB complex formation, CikA has access to binding  
752 sites usually occupied by KaiA, and becomes hyperactive; excessive CikA phosphatase activity  
753 extinguishes intracellular pools of P-RpaA and eliminates the cell's ability to express essential  
754 genes needed for survival in LDC. Figure modified from (11). The dotted line in the panel B  
755 graph represents the WT levels of P-RpaA from A.

756

## 757 Supplemental Material

### 758 Dataset Files

759 **Dataset S1:** This zipped file contains the annotated R script for determining genetic fitness  
760 estimates under LDC and the data files processed by the script: 1) "lightdarkbioreactors\_all.poolcount.csv", the location and reads of bar-coded transposon  
761 mutants for each sample 2) "lightdarkbioreactors\_exp.csv", designation of the samples as T0,  
762 control genotype, and experimental genotype 3) "genes.tab", the gene coordinate file used to  
763 map bar-coded transposon mutants to genes.  
764

765 **Dataset S2:** This Excel file has the following tabs: 1) Fitness estimates determined by  
766 processing the files in Dataset S1. 2) Search utility for displaying information easily for a desired  
767 gene locus id.

768 **Dataset S3:** This Excel table contains two sheets: 1) The data calculated from the Phos-tag<sup>TM</sup>  
769 immunoblots for RpaA phosphorylation and the corresponding blots they were derived from in  
770 Fig. S3; and 2) Data in a format for entering into R and using the script provided in the text box  
771 to perform the statistical analysis that generated the groupings in Fig. 6A.

772 **Dataset S4:** RB-TnSeq data comparing photobioreactor biological replicates, and the estimates  
773 from analysis of the library grown in triplicate in photobioreactors with the library grown on Petri  
774 plates and in 100 mL shake flasks under similar LDC conditions.

775 **Dataset S5:** This Excel file contains the data from the anisotropy measurements of *in vitro* KaiB,  
776 KaiC, and CikA.

777

778

779 **Supplemental Table**

780 **Table S1**

| Strain  | Genetic background                                                                                                  | Reporter             | Antibiotic resistance | Reference      |
|---------|---------------------------------------------------------------------------------------------------------------------|----------------------|-----------------------|----------------|
| AMC541  | WT <i>S.elongatus</i>                                                                                               | $P_{kaiBC} :: luc$ ; | Cm                    | (42)           |
| AMC06   | WT <i>S.elongatus</i>                                                                                               | none                 | none                  | Lab collection |
| AMC1161 | <i>kaiA</i> insertion; pAM2969 in AMC541                                                                            | $P_{kaiBC} :: luc$ ; | Cm Km                 | (58)           |
| AMC702  | <i>kaiA</i> deletion; in-frame markerless constructed in AMC541                                                     | $P_{kaiBC} :: luc$ ; | Cm                    | (58)           |
| AMC1936 | <i>kaiABC</i> knockout; pAM4252 in AMC541                                                                           | $P_{kaiBC} :: luc$ ; | Cm Km                 | (12)           |
| AMC1679 | <i>kaiA cikA</i> double knockout; pAM2152 in AMC702                                                                 | $P_{kaiBC} :: luc$ ; | Cm Gm                 | (56)           |
| AMC2479 | Complemented <i>kaiA cikA</i> double knockout; pAM3389 expressing <i>cikA</i> in AMC1679                            | $P_{kaiBC} :: luc$ ; | Cm SpSm               | This study     |
| AMC1100 | Complemented <i>kaiA</i> deletion; pAM2246 in AMC702 expressing WT <i>kaiA</i> in NS1.                              | $P_{kaiBC} :: luc$ ; | Cm SpSm               | (39)           |
| AMC2480 | Complemented <i>kaiA cikA</i> double knockout AMC1679 with pAM5294 expressing <i>cikA</i> <sup>C644R</sup> variant. | $P_{kaiBC} :: luc$ ; | Cm SpSm               | This study     |
| AMC2481 | <i>kaiA</i> deletion; pAM5389 in AMC541                                                                             | $P_{kaiBC} :: luc$ ; | Cm SpSm               | This study     |
| AMC2482 | Remade <i>kaiA cikA</i> double knockout; pAM2152 in AMC2481                                                         | $P_{kaiBC} :: luc$ ; | Cm SpSm Gm            | This study     |
| AMC2483 | Remade <i>kaiA cikA</i> double knockout; pAM2152 in AMC702                                                          | $P_{kaiBC} :: luc$ ; | Cm Gm                 | This study     |

781

782

783 **Fig. S1. Mutant strain complementation reverses phenotype.** (A) Dilution spot plate showing  
784 growth of various *kaiA* mutant strains under CLC or LDC conditions. Reintroduction of *kaiA*  
785 greatly improves the growth of the *kaiA* deletion mutant (compare rows 6 and 3 in LDC);  
786 reintroduction of *cikA* into the *kaiA<sup>del</sup>cikA* double mutant reverses the alleviating effects of *cikA*  
787 disruption (compare rows 7 and 4) (B) Genetic map showing a representation of the strain  
788 backgrounds. C. DNA gel electrophoresis of PCR amplification confirming mutations in *kaiA*  
789 gene in *kaiA* mutant strains.

790 **Fig. S2. Effect of antibiotic marker expression during head-to-head growth competition.**  
791 WT cultures with antibiotic resistance cassettes for either Gm or Km in a neutral site of the  
792 genome were mixed in a 1:1 ratio and competed against each other in a head-to-head growth  
793 assay without antibiotics under CLC and LDC conditions.

794 **Fig. S3. Immunoblots for determining RpaA phosphorylation and KaiC levels.** For blots A-  
795 F Phos-tag<sup>TM</sup> was added to cell extracts to distinguish phosphorylated from non-phosphorylated  
796 proteins and antisera were used to identify the labeled protein in each panel. Panels A-B and G  
797 show proteins taken from cells sampled at the end of the light period after 3 consecutive 12-h  
798 light:12-h dark cycles. Panels E-F show samples taken every 12 h over the course of a 12-h  
799 light: 12-h dark cycle; even lanes are samples at the end of the dark period and odd lanes are  
800 samples taken at the end of the light period. Genotypes of strains are listed in Table S1.

801 (A) lanes: 1, AMC541; 2, AMC702; 3, AMC2481; 4, AMC2481; 5, AMC2482; 6, AMC2482; 7,  
802 AMC1679; 8, AMC2480; 9, AMC2480; 10, AMC2479; 11, AMC2479; 12, AMC2483; 13,  
803 AMC1161; 14, AMC1936;

804 (B) lanes: 1, AMC541; 2, AMC1161; 3, AMC702; 4, AMC1936; 5, AMC1679; 6, AMC2479.

805 (C) lanes: 1, AMC541; 2, AMC1161; 3, AMC702; 4, AMC1679; 5, AMC1100; 6, AMC2479; 7,  
806 empty; 8, AMC541; 9, AMC2481; 10, AMC702; 11, empty; 12, AMC1936; 13, empty.

807 (D) lanes: 1-6, AMC541; 7-12, AMC702.

808 (E) lanes: 1-6, AMC541; 7-12, AMC702.

809 (F) lanes 1-6, AMC541; 7-12, AMC1679.

810 (G) lanes: 1, AMC541; 2, AMC1161; 3, AMC2481; 4, AMC2482; 5, empty; 6, AMC2482; 7,  
811 empty; 8, AMC541; 9, AMC1161; 10, AMC702; 11, AMC1679; 12, AMC1936.

812 **Fig. S4. Comparison of LDC Rb-TnSeq results across replicates and growth conditions.**  
813 (A) Strain fitness for each photobioreactor replicate was estimated as previously described in  
814 (24). Fitness scores with t-statistics  $\geq |4|$  were compared against each other showing agreement  
815 among biological replicates. (B) Comparison of LDC fitness results screening the library in  
816 different growth formats including photobioreactors, Erlenmeyer flasks, and Petri plates.  
817 Because there was only 1 measurement each for the plates and flask screens, the stringency  
818 for sensitivity scores was relaxed. (C) Summary of the 13 mutant strains that showed strong  
819 LDC defects across all growth media situations.

820 **Fig. S5. SDS-PAGE analysis of KaiC and CikA stability and KaiC dephosphorylation.** (A)  
821 17% SDS-PAGE analysis of KaiC-EA or KaiC-AE and CikA before and after KaiB binding  
822 assays. (B) 17% SDS-PAGE analysis of KaiC and CikA stability before and after KaiB binding  
823 assays. (C) 6.5% SDS-PAGE analysis showing that KaiC retains a hypophosphorylated state  
824 during KaiB-binding assays. Note that all samples other than the controls contain 6-IAF-labeled  
825 KaiB-FLAG-K25C. Due to the low concentration of KaiB (0.05  $\mu$ M), SDS-PAGE runs were  
826 optimized only for visualization of KaiC and CikA. The stable anisotropy readings of free KaiB,  
827 shown in Fig. 7, suggest its stability for the duration of the binding assays.

828 **Figure 1**

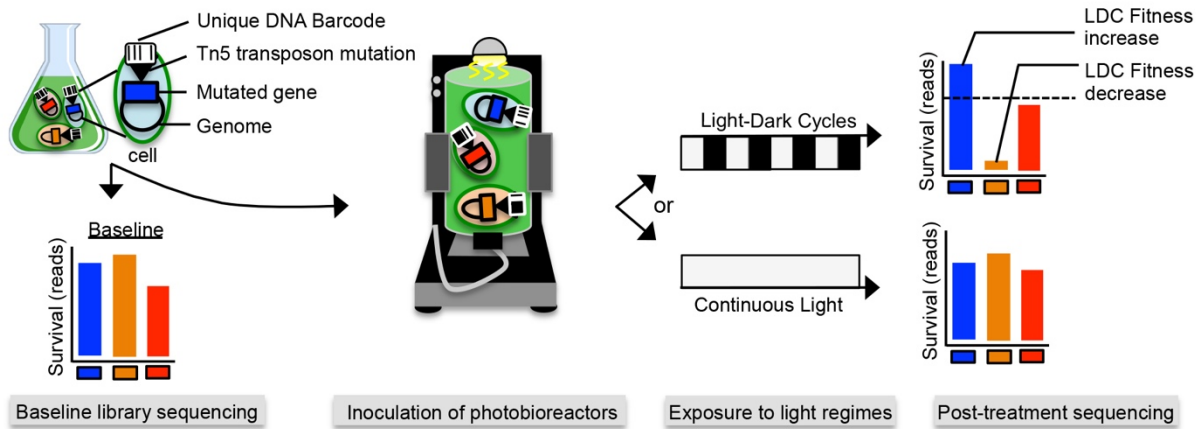

829

830 **Figure 2**

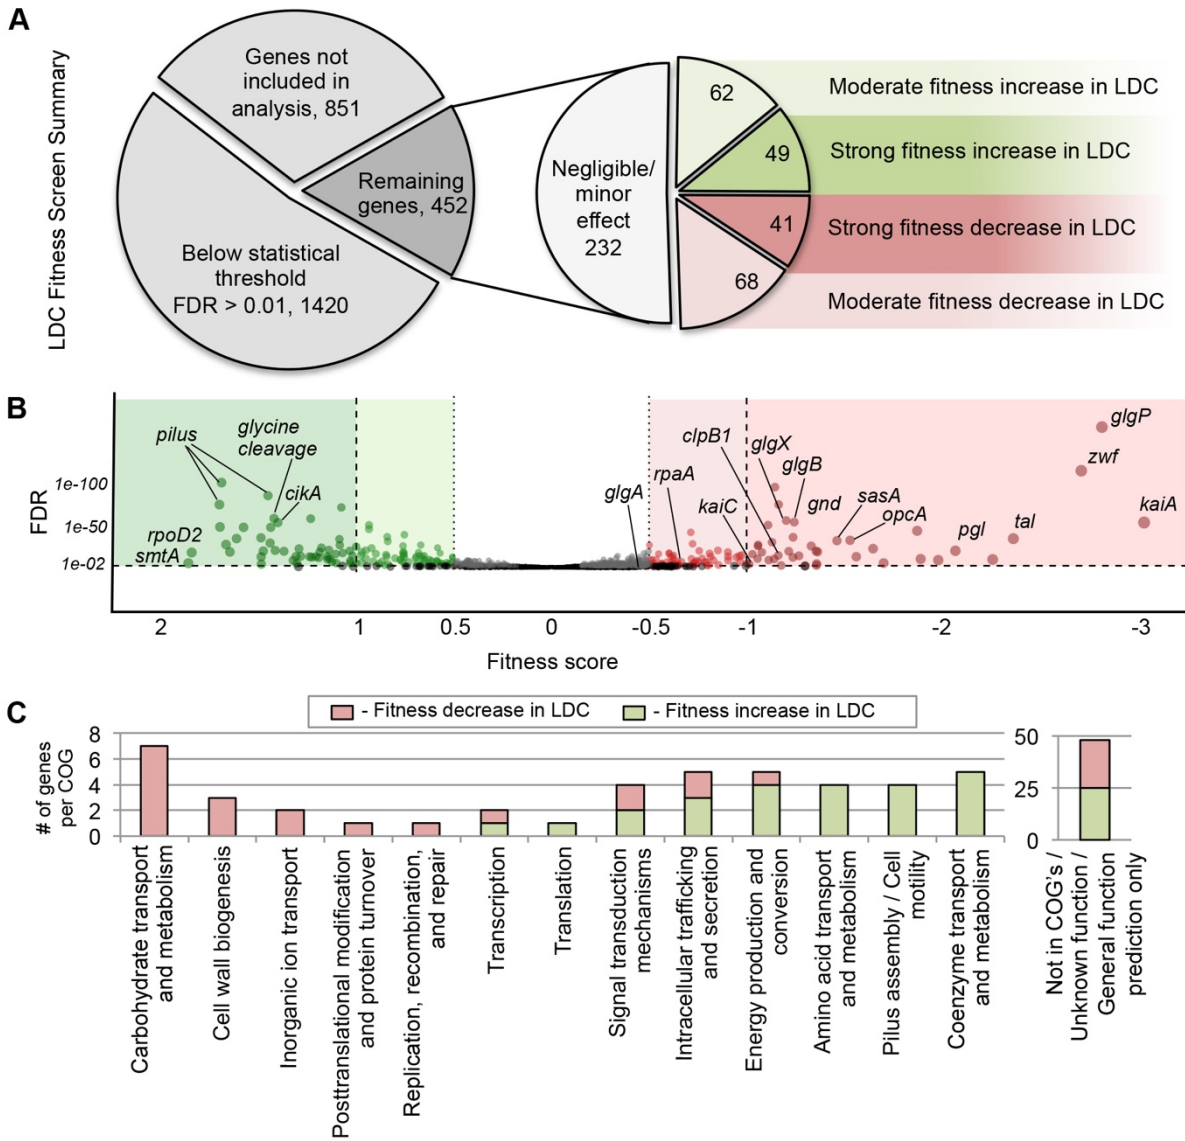

831

832 **Figure 3**

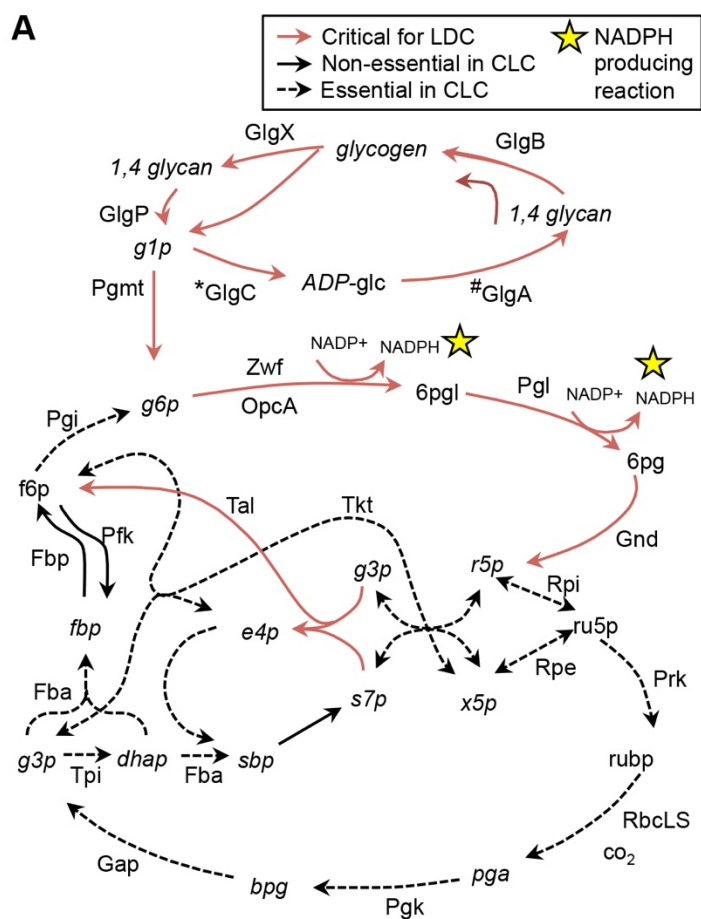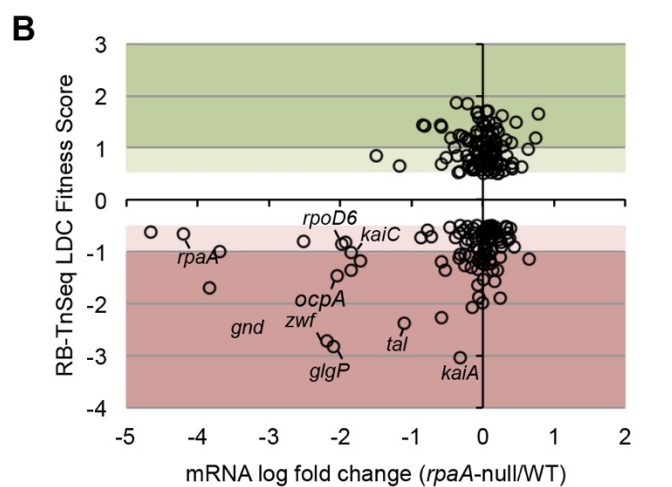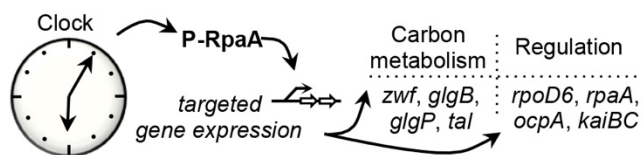

833

834

835 **Figure 4**

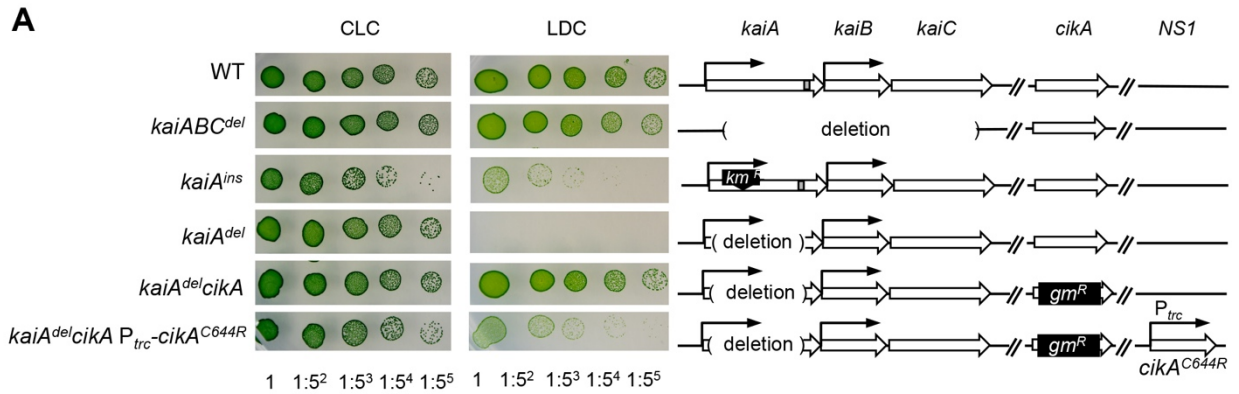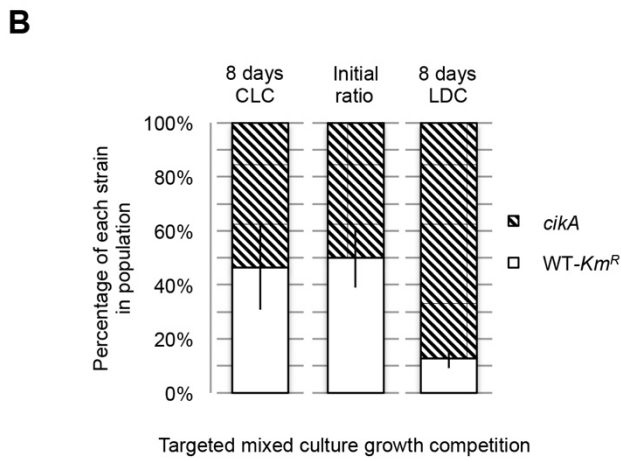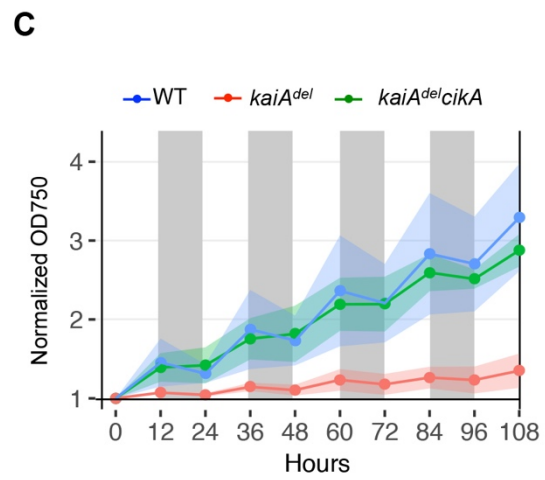

836



837 **Figure 5**

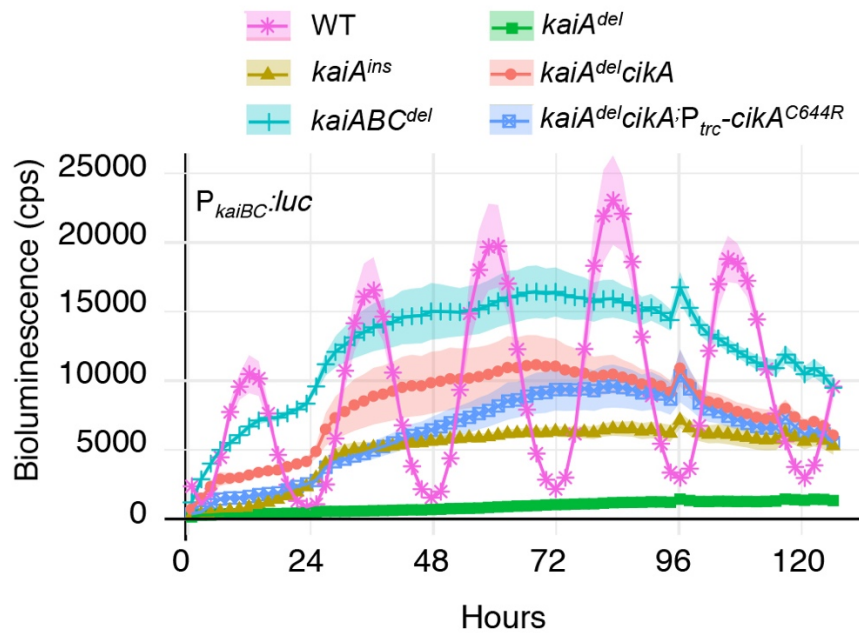

838

839 **Figure 6**

**A**

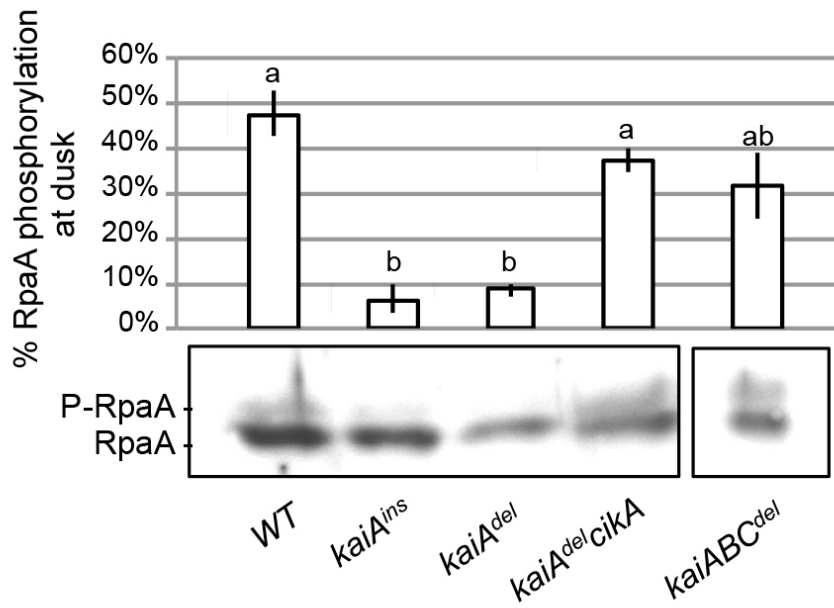

**B**

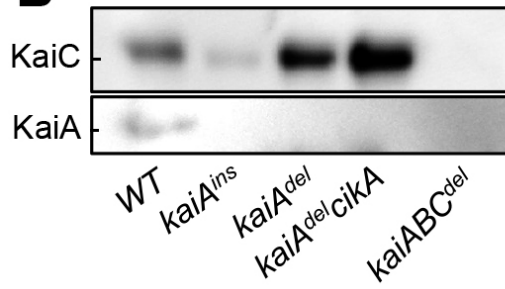

**D**

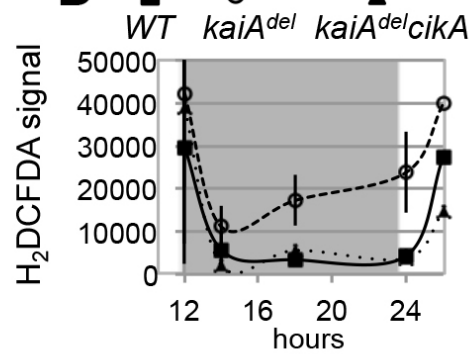

**C**

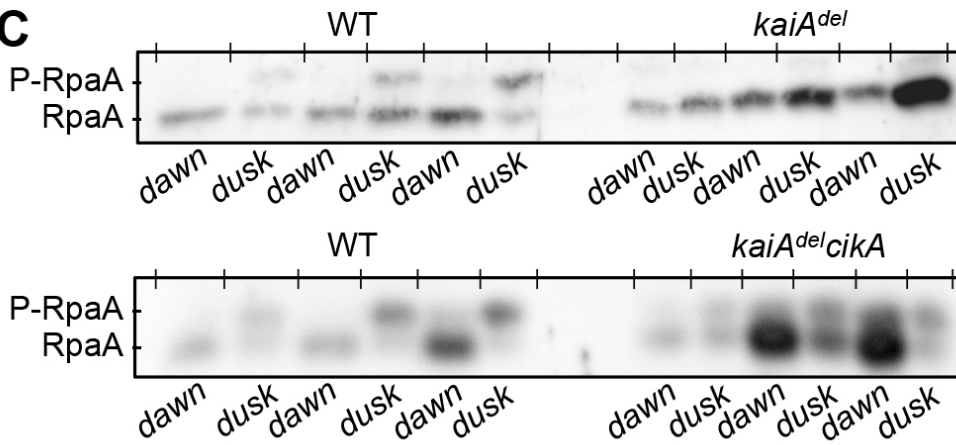

840

841

842 **Figure 7**

**A**

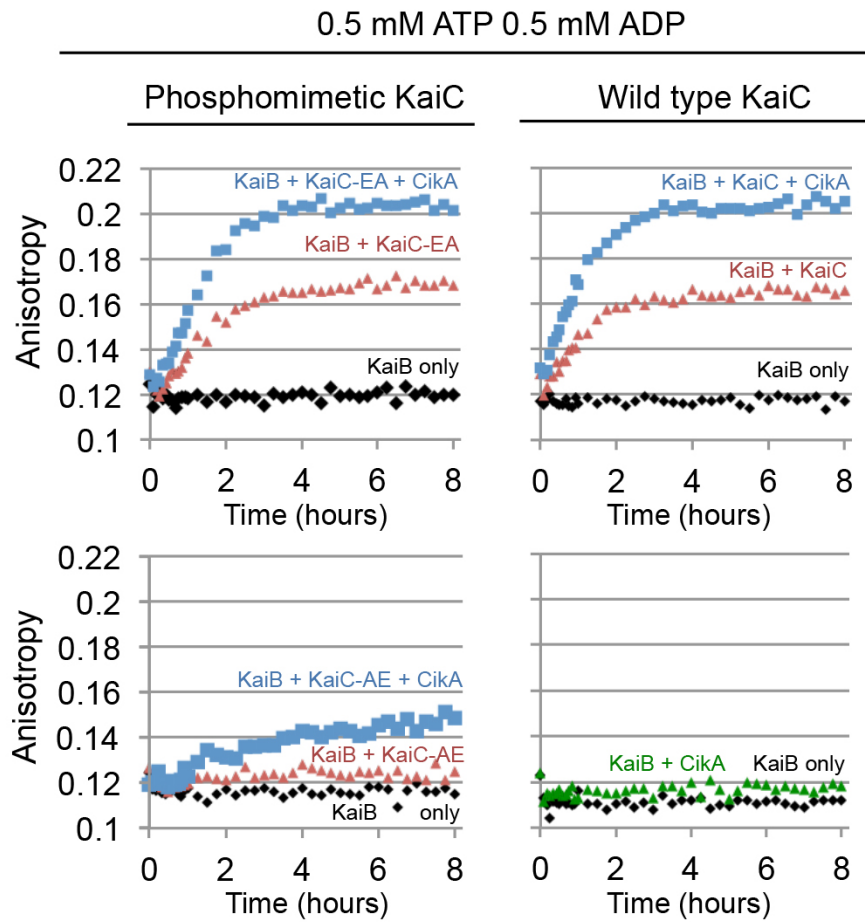

**B**

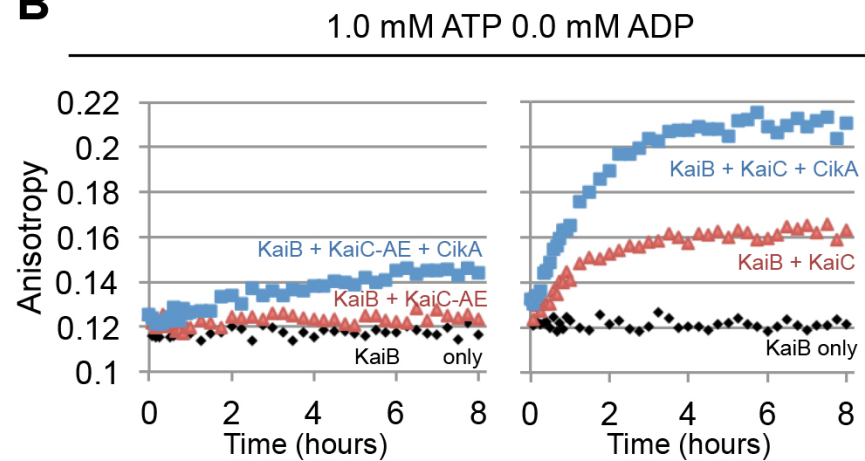

843

844 **Figure 8**

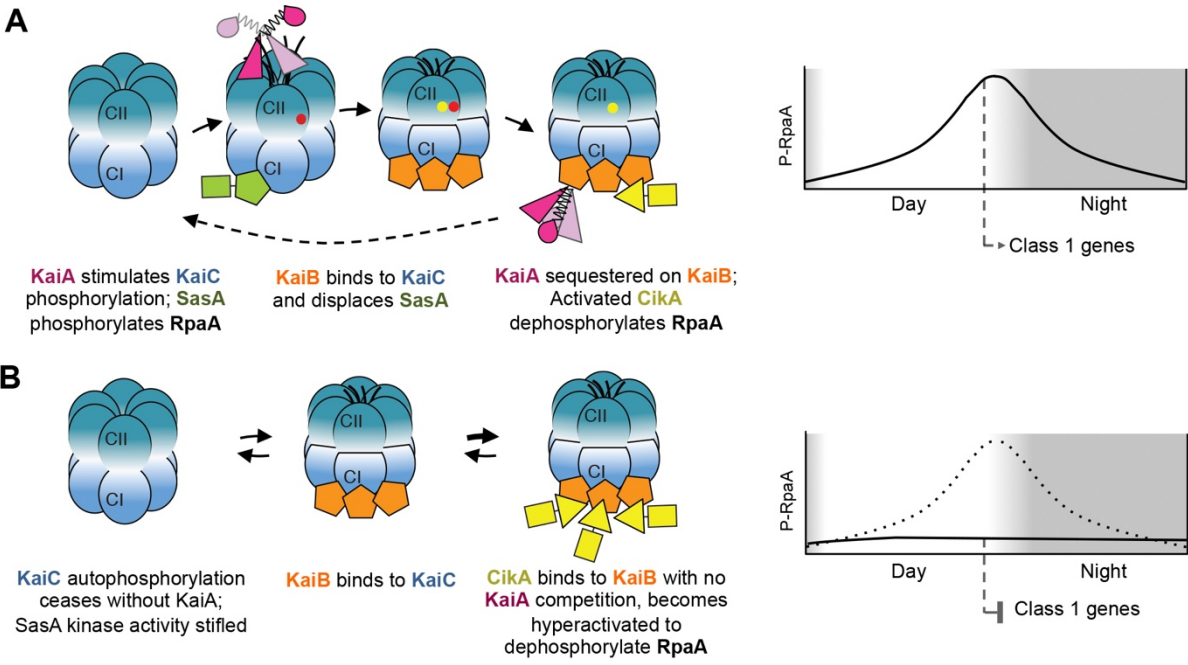

845

846 **Figure S1**

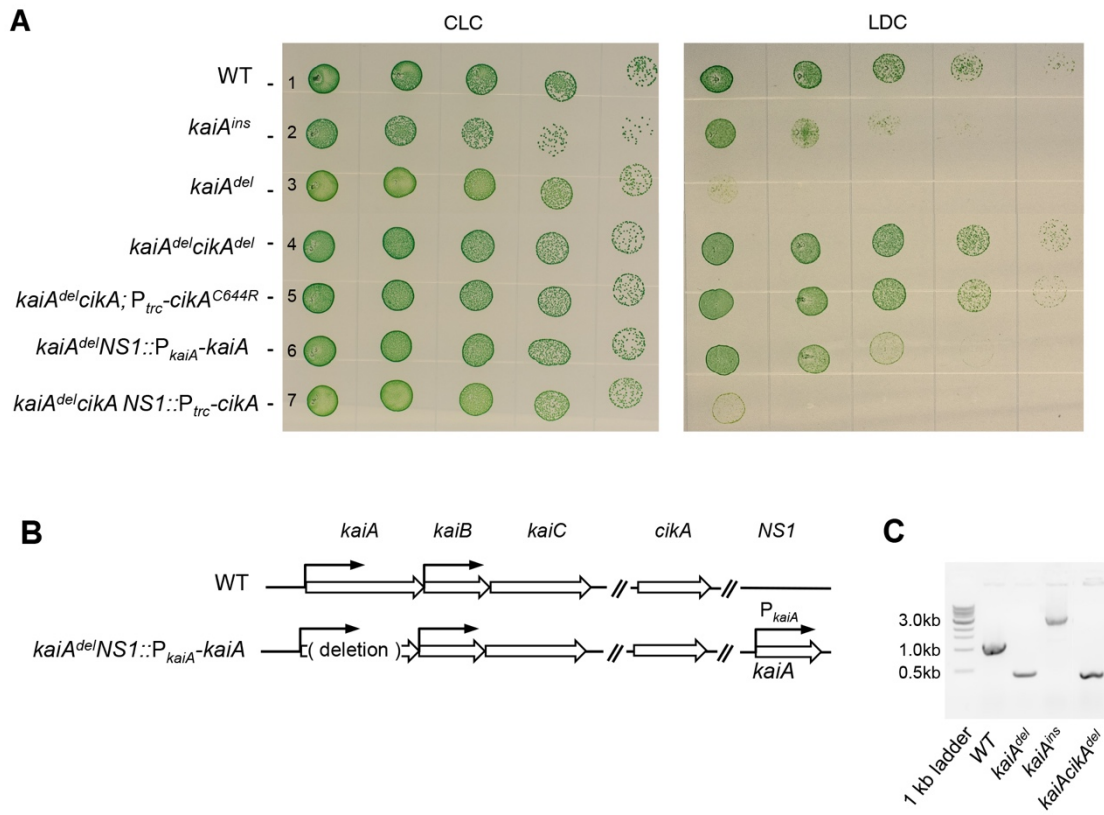

847

848 **Figure S2**

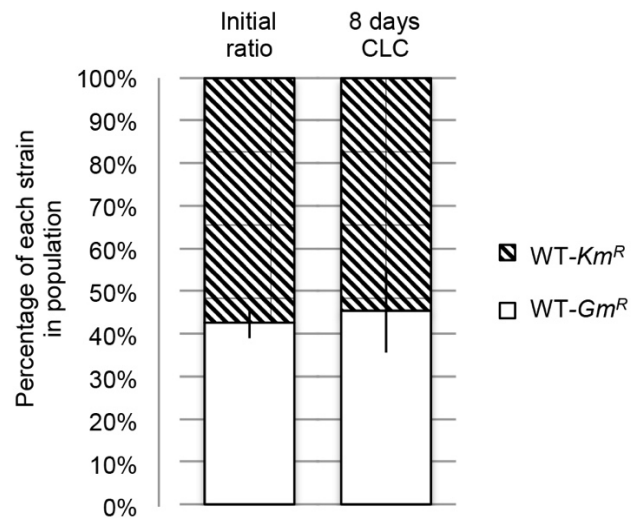

849

850 **Figure S3**

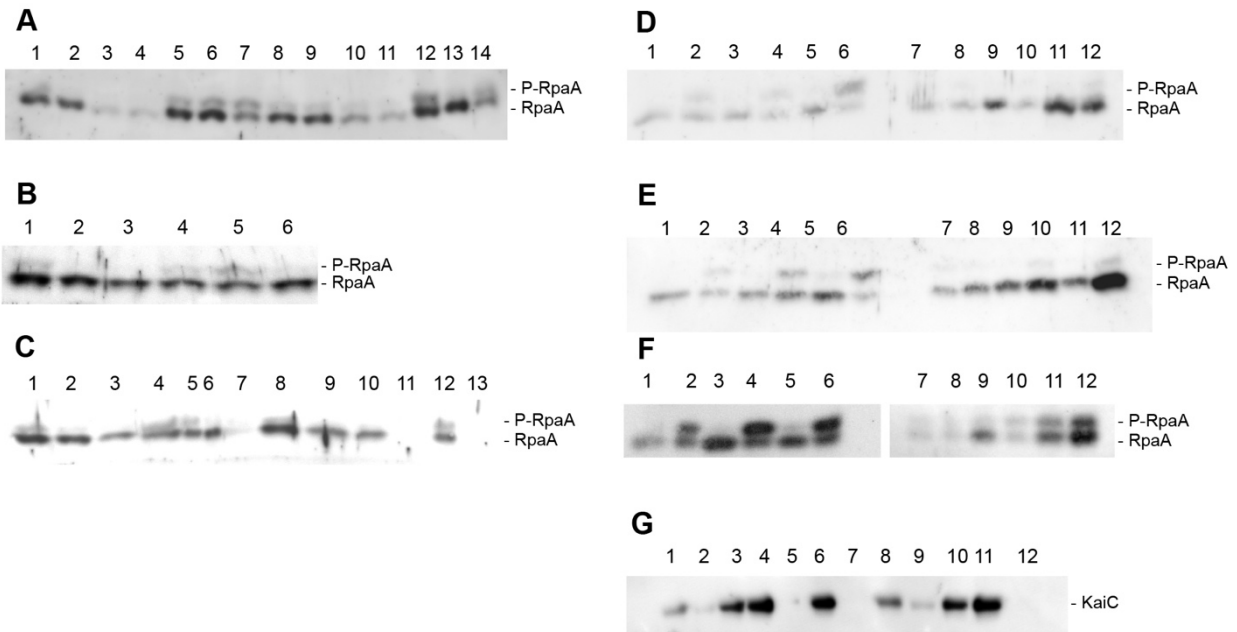

851

852 **Figure S4**

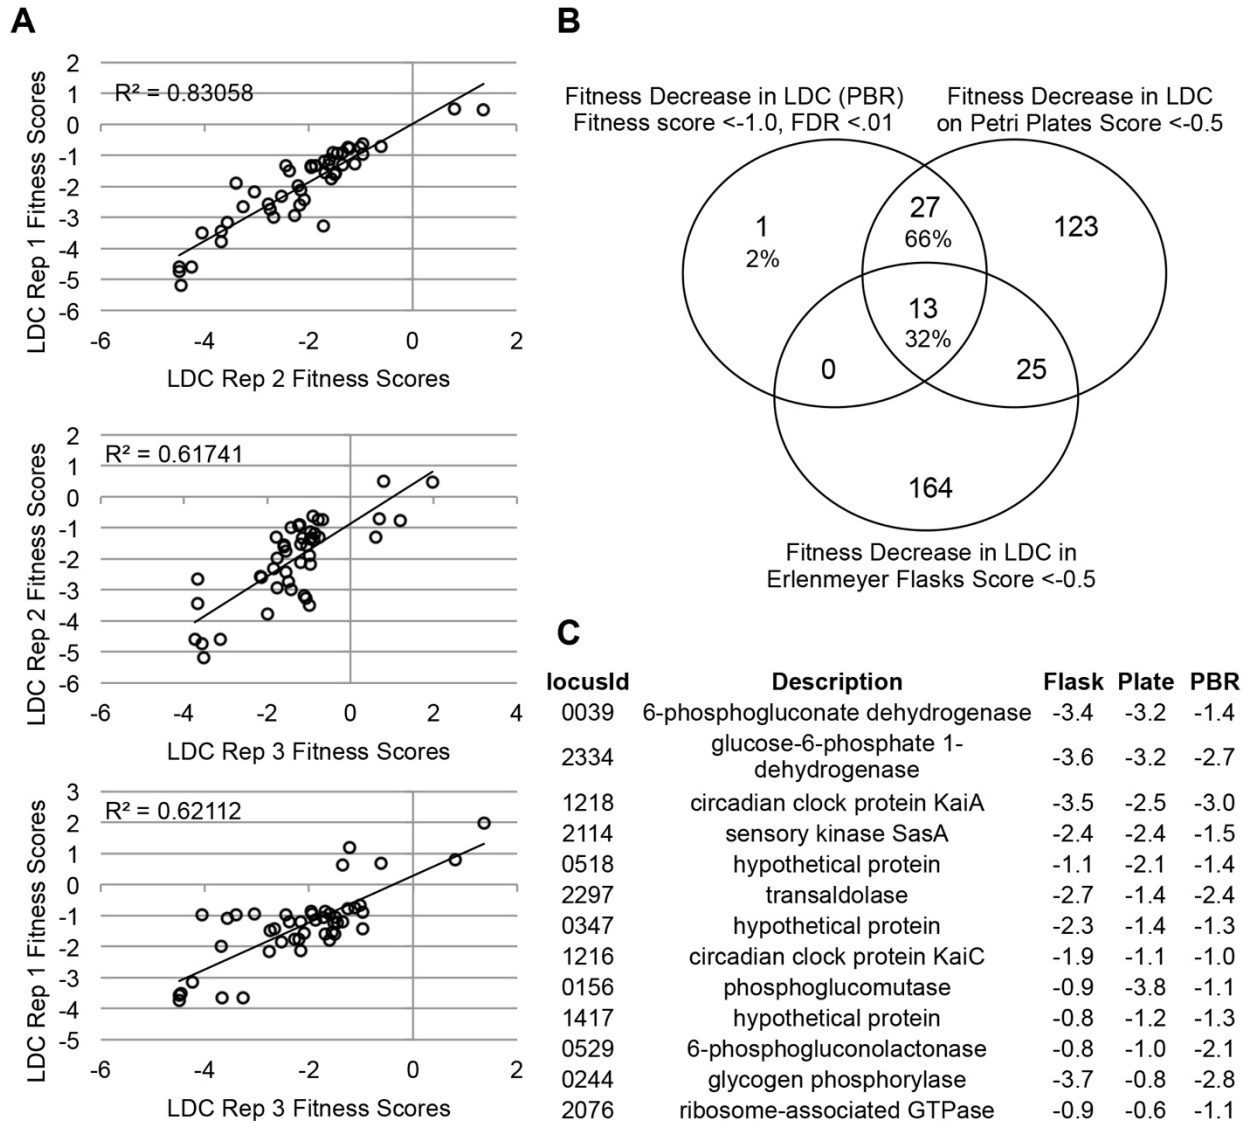

853



854 **Figure S5**

**SDS-PAGE analysis of KaiC and CikA stability and KaiC dephosphorylation:**  
**(A) 17% SDS-PAGE analysis of KaiC-EA or KaiC-AE and CikA; (B) 17% SDS-PAGE analysis of KaiC and CikA;**  
**(C): 6.5 % SDS-PAGE gels showing that KaiC remained hypophosphorylated during KaiB binding assays**

**A**

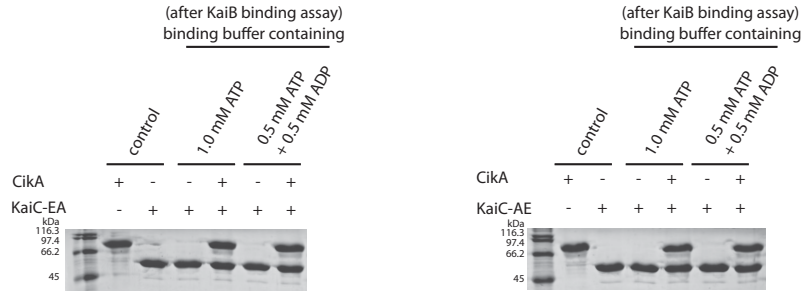

**B**

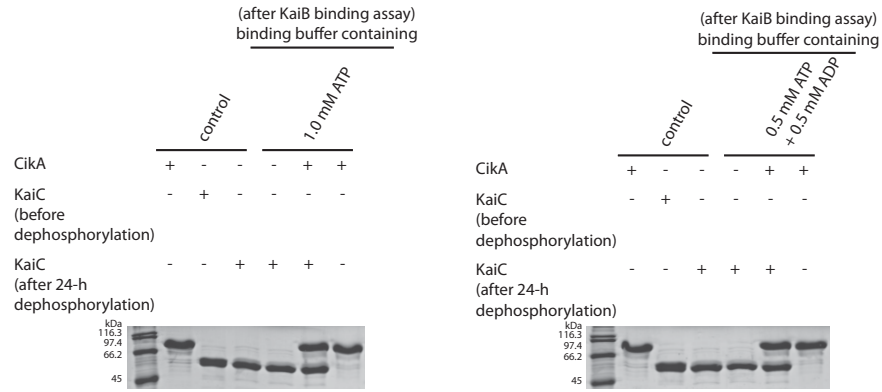

**C**

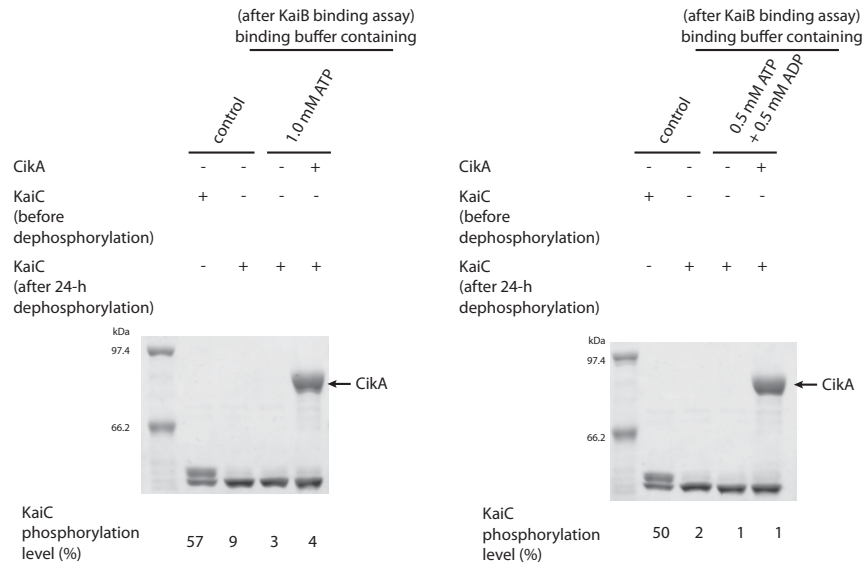

Source: http://biorxiv.org/content/10.1101/283812v1.full.pdf
